# Supplementary material
Source: PubMed Central journal article supplement (PMC2757613)
Supplement: 775_2007_296_MOESM1_ESM.pdf [file 775_2007_296_MOESM1_ESM.pdf]

# Towards extracellular Ca<sup>2+</sup> sensing by MRI: synthesis and calcium-dependent <sup>1</sup>H and <sup>17</sup>O relaxation studies of two novel bismacrocylic ligands

Kirti Dhingra,<sup>a</sup> Petra Fousková,<sup>b</sup> Goran Angelovski,<sup>a</sup> Martin E. Maier,<sup>c</sup> Nikos K. Logothetis,<sup>a,d</sup> Éva Tóth<sup>\*b</sup>

<sup>a</sup> Max Planck Institute for Biological Cybernetics, 72076 Tübingen, Germany

<sup>b</sup> Centre de Biophysique Moléculaire, CNRS, 45071 Orléans Cedex 2, France

<sup>c</sup> Institute für Organische Chemie, Universität Tübingen, Germany

<sup>d</sup> Imaging Science and Biomedical Engineering, University of Manchester, Manchester, U.K.

**Appendix.** Equations used in the analysis of <sup>17</sup>O NMR and <sup>1</sup>H NMRD data.

**Table S1.** Proton relaxivities ( $r_1 / \text{mM}^{-1}\text{s}^{-1}$ ) of Gd<sub>2</sub>L<sup>1</sup> in the absence of Ca<sup>2+</sup>, c(Gd<sup>3+</sup>)=5.1 mM, pH=6.25, at 25 and 37°C.

**Table S2.** Proton relaxivities ( $r_1 / \text{mM}^{-1}\text{s}^{-1}$ ) of Gd<sub>2</sub>L<sup>1</sup> in the presence of Ca<sup>2+</sup>, c(Gd<sup>3+</sup>)=3.2 mM, c(Ca<sup>2+</sup>)=4.4 mM, pH=7, at 15.5, 25 and 37°C.

**Table S3.** Variable temperature reduced transverse and longitudinal <sup>17</sup>O relaxation rates of Gd<sub>2</sub>L<sup>1</sup> in the absence of Ca<sup>2+</sup>, c(Gd<sup>3+</sup>)=51.8 mM, pH=7, P<sub>m</sub>=4.00·10<sup>-4</sup> at 11.75 T. Reference was acidified H<sub>2</sub>O, pH=3.4.

**Table S4.** Variable temperature reduced transverse and longitudinal <sup>17</sup>O relaxation rates of Gd<sub>2</sub>L<sup>1</sup> in the presence of 1M Ca<sup>2+</sup>, c(Gd<sup>3+</sup>)=45.6 mM, pH=7, P<sub>m</sub>=5.41·10<sup>-4</sup> at 11.75 T. Reference was acidified 1M CaCl<sub>2</sub>.

**Table S5.** Relaxometric Ca<sup>2+</sup> titration of Gd<sub>2</sub>L<sup>1</sup> at 25°C, pH neutral and 11.75 T.

**Table S6.** Relaxometric Ca<sup>2+</sup> titration of Gd<sub>2</sub>L<sup>2</sup> at 25°C, pH neutral and 11.75 T.

**Table S7.** Relaxometric Mg<sup>2+</sup> titration of Gd<sub>2</sub>L<sup>1</sup> at 25°C, pH neutral and 11.75 T.

**Table S8.** Luminescence lifetimes measurements on Eu<sub>2</sub>L<sup>1</sup> at 25°C, pH neutral, and the calculated hydration numbers  $q$ .

**Figure S1.** Variable Ca<sup>2+</sup> concentration UV-Vis studies on Eu<sub>2</sub>L<sup>1</sup> at 50°C.

**Figure S2.** Variable Ca<sup>2+</sup> concentration UV-Vis studies on Eu<sub>2</sub>L<sup>1</sup> at 37°C.

**Figure S3.** Variable Ca<sup>2+</sup> concentration UV-Vis studies on Eu<sub>2</sub>L<sup>1</sup> at 25°C.

**Figure S4.** Variable Ca<sup>2+</sup> concentration UV-Vis studies on Eu<sub>2</sub>L<sup>1</sup> at 15.5°C.

**Table S9.** Fitted parameters of Gd<sub>2</sub>L<sup>1</sup> in the absence of Ca<sup>2+</sup>. The underlined parameters were fixed during the fitting.

**Table S10.** Fitted parameters of Gd<sub>2</sub>L<sup>1</sup> in the presence of 1M Ca<sup>2+</sup>. The underlined parameters were fixed during the fitting.

**Figure S5.** IR spectrum of the ligand L<sup>1</sup>.

**Figure S6.** IR spectrum of Gd<sub>2</sub>L<sup>1</sup> complex.

**Figure S7.** <sup>1</sup>H NMR spectrum of the compound 6a.

**Figure S8.** <sup>13</sup>C NMR spectrum of the compound 6a.

**Figure S9.** <sup>1</sup>H NMR spectrum of the ligand L<sup>1</sup>.

**Figure S10.** <sup>13</sup>C NMR spectrum of the ligand L<sup>1</sup>.

**Figure S11.** <sup>1</sup>H NMR spectrum of the ligand L<sup>2</sup>.

**Figure S12.** <sup>13</sup>C NMR spectrum of the ligand L<sup>2</sup>.

**Figure S13.** <sup>1</sup>H-<sup>1</sup>H COSY spectrum of the compound 6a.

**Figure S14.** <sup>1</sup>H-<sup>13</sup>C HSQC spectrum of the compound 6a.

## Equations.

### <sup>17</sup>O NMR relaxation:

From the measured <sup>17</sup>O NMR relaxation rates of the paramagnetic solutions,  $1/T_1$  and  $1/T_2$ , and of the acidified water reference,  $1/T_{1A}$  and  $1/T_{2A}$ , one can calculate the reduced relaxation rates,  $1/T_{1r}$ ,  $1/T_{2r}$  (Eq. [1] and [2]), where  $1/T_{1m}$ ,  $1/T_{2m}$  are the relaxation rates of the bound water and  $\Delta\omega_m$  is the chemical shift difference between bound and bulk water,  $\tau_m$  is the mean residence time or the inverse of the water exchange rate  $k_{ex}$  and  $P_m$  is the mole fraction of the bound water.<sup>1,2</sup>

$$\frac{1}{T_{1r}} = \frac{1}{P_m} \left[ \frac{1}{T_1} - \frac{1}{T_{1A}} \right] = \frac{1}{T_{1m} + \tau_m} + \frac{1}{T_{1OS}} \quad [1]$$

$$\frac{1}{T_{2r}} = \frac{1}{P_m} \left[ \frac{1}{T_2} - \frac{1}{T_{2A}} \right] = \frac{1}{\tau_m} \frac{T_{2m}^{-2} + \tau_m^{-1} T_{2m}^{-1} + \Delta\omega_m^2}{(\tau_m^{-1} + T_{2m}^{-1})^2 + \Delta\omega_m^2} + \frac{1}{T_{2OS}} \quad [2]$$

The terms  $1/T_{1OS}$  and  $1/T_{2OS}$  describe relaxation contributions from water molecules not directly bound to the paramagnetic centre. In previous studies it has been shown that <sup>17</sup>O outer sphere relaxation terms due to water molecules freely diffusing on the surface of Gd-polyaminocarboxylate complexes are negligible. For complexes with electronegative groups relaxation terms due to 2<sup>nd</sup> sphere water molecules can however be important for longitudinal relaxation  $1/T_{1r}$  and have therefore to be included.

$$\frac{1}{T_{1r}} = \frac{1}{T_{1r}^{1st}} + \frac{1}{T_{1r}^{2nd}} = \frac{1}{T_{1m} + \tau_m} + \frac{1}{T_{1r}^{2nd}} \quad [3]$$

$$\frac{1}{T_{2r}} = \frac{1}{T_{2r}^{1st}} = \frac{1}{\tau_m} \frac{T_{2m}^{-2} + \tau_m^{-1} T_{2m}^{-1} + \Delta\omega_m^2}{(\tau_m^{-1} + T_{2m}^{-1})^2 + \Delta\omega_m^2} \quad [4]$$

First sphere contribution to <sup>17</sup>O relaxation:

The <sup>17</sup>O longitudinal relaxation rates in Gd(III) solutions are the sum of the contributions of the dipole-dipole and quadrupolar (in the approximation developed by Halle for non-extreme narrowing conditions) mechanisms as expressed by Eq. [6]-[7], where  $\gamma_S$  is the electron and  $\gamma_I$  is the nuclear gyromagnetic ratio ( $\gamma_S = 1.76 \times 10^{11} \text{ rad} \cdot \text{s}^{-1} \cdot \text{T}^{-1}$ ,  $\gamma_I = -3.626 \times 10^7 \text{ rad} \cdot \text{s}^{-1} \cdot \text{T}^{-1}$ ),  $r_{GdO}$  is the effective distance between the electron charge and the <sup>17</sup>O nucleus,  $I$  is the nuclear spin (5/2 for <sup>17</sup>O),  $\chi$  is the quadrupolar coupling constant and  $\eta$  is an asymmetry parameter:

$$\frac{1}{T_{1m}} = \frac{1}{T_{1dd}} + \frac{1}{T_{1q}} \quad [5]$$

$$\frac{1}{T_{1dd}} = \frac{2}{15} \left( \frac{\mu_0}{4\pi} \right)^2 \frac{\hbar^2 \gamma_I^2 \gamma_S^2}{r_{GdO}^6} S(S+1) [3J(\omega_I; \tau_{d1}) + 7J(\omega_S; \tau_{d2})]; \quad J(\omega; \tau) = \frac{\tau}{1 + (\omega\tau)^2} \quad [6]$$

$$\frac{1}{\tau_{d1}} = \frac{1}{\tau_m} + \frac{1}{T_{1e}} + \frac{1}{\tau_{RO}}$$

$$\frac{1}{T_{1q}} = \frac{3\pi^2}{10} \frac{2I+3}{I^2(2I-1)} \chi^2 \left( 1 + \frac{\eta^2}{3} \right) [0.2J_1(\omega_I; \tau_{RO}) + 0.8J_2(\omega_I; \tau_{RO})]; \quad J_n(\omega; \tau) = \frac{\tau}{1 + (n\omega\tau)^2} \quad [7]$$

In the transverse relaxation the scalar contribution,  $1/T_{2sc}$ , is dominating, Eq. [8].  $1/\tau_{S1}$  is the sum of the exchange rate constant and the electron spin relaxation rate.

$$\frac{1}{T_{2m}} \cong \frac{1}{T_{2SC}} = \frac{S(S+1)}{3} \left( \frac{A}{\hbar} \right)^2 \tau_{S1} \quad [8]$$

$$\frac{1}{\tau_{S1}} = \frac{1}{\tau_m} + \frac{1}{T_{1e}} \quad [9]$$

Second sphere contribution to <sup>17</sup>O relaxation:

$$\frac{1}{T_1^{2nd}} \cong \frac{q^{2nd}}{q^{1st}} \frac{1}{T_{1m}^{2nd}} = \frac{q^{2nd}}{q^{1st}} \left( \frac{1}{T_{1dd}^{2nd}} + \frac{1}{T_{1q}^{2nd}} \right) \quad [10]$$

$$\frac{1}{T_{1dd}^{2nd}} = C_{dd}^{2nd,O} \left( \frac{3\tau_{d1}^{2nd,O}}{1 + (\omega_1 \tau_{d1}^{2nd,O})^2} + \frac{7\tau_{d2}^{2nd,O}}{1 + (\omega_S \tau_{d2}^{2nd,O})^2} \right) \quad [11]$$

$$C_{dd}^{2nd,O} = \frac{2}{15} \left( \frac{\mu_0}{4\pi} \right)^2 \frac{\hbar^2 \gamma_I^2 \gamma_S^2}{(r_{GdO}^{2nd})^6} S(S+1)$$

$$\frac{1}{T_{1q}^{2nd}} = \frac{3\pi^2}{10} \frac{2I+3}{I^2(2I-1)} \chi^2 (1 + \eta^2/3) \left( \frac{0.2\tau^{2nd,O}}{1 + (\omega_1 \tau^{2nd,O})^2} + \frac{0.8\tau^{2nd,O}}{1 + (2\omega_1 \tau^{2nd,O})^2} \right) \quad [12]$$

$$\frac{1}{\tau^{O,2nd}} = \frac{1}{\tau_g} + \frac{1}{\tau_1^O} \cong \frac{1}{\tau_1^O} \quad [13]$$

$$\frac{1}{\tau_{di}^{2nd,O}} = k_{ex}^{2nd} + \frac{1}{\tau^{O,2nd}} + \frac{1}{T_{ie}} \quad [14]$$

### <sup>1</sup>H NMRD:

The measured longitudinal proton relaxation rate,  $R_1^{obs}$  is the sum of a paramagnetic and a diamagnetic contribution as expressed in Eq. [15], where  $r_1$  is the proton relaxivity:

$$R_1^{obs} = R_1^d + R_1^p = R_1^d + r_1 [Gd^{3+}] \quad [15]$$

The relaxivity is here given by the sum of inner sphere, second sphere and outer sphere contributions:

$$r_1 = r_{1is} + r_{1,2nd} + r_{1os} \quad [16]$$

Inner sphere <sup>1</sup>H relaxation:

The inner sphere term is given in Eq. [17], where  $q^{1st}$  is the number of inner sphere water molecules.<sup>3</sup>

$$r_{1is} = \frac{1}{1000} \times \frac{q^{1st}}{55.55} \times \frac{1}{T_{1m}^H + \tau_m} \quad [17]$$

The longitudinal relaxation rate of inner sphere protons,  $1/T_{1m}^H$  is expressed by Eq. [18], where  $r_{GdH}$  is the effective distance between the electron charge and the <sup>1</sup>H nucleus,  $\omega_I$  is the proton resonance frequency and  $\omega_S$  is the Larmor frequency of the Gd(III) electron spin.

$$\frac{1}{T_{1m}^H} = \frac{2}{15} \left( \frac{\mu_0}{4\pi} \right)^2 \frac{\hbar^2 \gamma_I^2 \gamma_S^2}{r_{GdH}^6} S(S+1) [3J(\omega_I; \tau_{d1}) + 7J(\omega_S; \tau_{d2})] \quad [18]$$

$$J(\omega; \tau_{di}) = \left( \frac{S^2 \tau_{dig}}{1 + \omega^2 \tau_{dig}^2} + \frac{(1 - S^2) \tau_{di}}{1 + \omega^2 \tau_{di}^2} \right); \quad i = 1, 2 \quad [19]$$

$$\frac{1}{\tau_{dig}} = \frac{1}{\tau_m} + \frac{1}{\tau_g} + \frac{1}{T_{ie}}; \quad \frac{1}{\tau_{di}} = \frac{1}{\tau_m} + \frac{1}{\tau^H} + \frac{1}{T_{ie}}; \quad i = 1, 2 \quad [20]$$

$$\frac{1}{\tau^H} = \frac{1}{\tau_g} + \frac{1}{\tau_1^H} \quad [21]$$

The spectral density functions are given by Eq. [19].

Second sphere <sup>1</sup>H relaxation:

$$r_1^{2nd} = \frac{1}{1000} \times \frac{q^{2nd}}{55.55} \times \frac{1}{T_{1dd}^{2nd,H} + \tau_m^{2nd}} \cong \frac{1}{1000} \times \frac{q^{2nd}}{55.55} \times \frac{1}{T_{1dd}^{2nd,H}} \quad [22]$$

$$\frac{1}{T_{1dd}^{2nd,H}} = C_{dd}^{2nd,O} \left( \frac{3\tau_{d1}^{2nd,H}}{1 + (\omega_1 \tau_{d1}^{2nd,H})^2} + \frac{7\tau_{d2}^{2nd,H}}{1 + (\omega_s \tau_{d2}^{2nd,H})^2} \right) \quad [23]$$

$$C_{dd}^{2nd,H} = \frac{2}{15} \left( \frac{\mu_0}{4\pi} \right)^2 \frac{\hbar^2 \gamma_H^2 \gamma_S^2}{(r_{GdO}^{2nd})^6} S(S+1) \quad [24]$$

$$\frac{1}{\tau_{di}^{2nd,H}} = k_{ex}^{2nd} + \frac{1}{\tau^H} + \frac{1}{T_{ie}} \quad [25]$$

$$\frac{1}{\tau^H} = \frac{1}{\tau_g} + \frac{1}{\tau_1^H} \quad [26]$$

Outer sphere  $^1H$  relaxation:

The outer-sphere contribution can be described by Eq. [27] where  $N_A$  is the Avogadro constant, and  $J_{os}$  is its associated spectral density function.<sup>4,5</sup>

$$r_{1os} = \frac{32N_A\pi}{405} \left( \frac{\mu_0}{4\pi} \right)^2 \frac{\hbar^2 \gamma_S^2 \gamma_I^2}{a_{GdH} D_{GdH}} S(S+1) [3J_{os}(\omega_I; T_{1e}) + 7J_{os}(\omega_S; T_{2e})] \quad [27]$$

$$J_{os}(\omega, T_{je}) = \text{Re} \left[ \frac{1 + \frac{1}{4} \left( i\omega\tau_{GdH} + \frac{\tau_{GdH}}{T_{je}} \right)^{1/2}}{1 + \left( i\omega\tau_{GdH} + \frac{\tau_{GdH}}{T_{je}} \right)^{1/2} + \frac{4}{9} \left( i\omega\tau_{GdH} + \frac{\tau_{GdH}}{T_{je}} \right) + \frac{1}{9} \left( i\omega\tau_{GdH} + \frac{\tau_{GdH}}{T_{je}} \right)^{3/2}} \right]; \quad j=1,2 \quad [28]$$

$$\tau_{GdH} = \frac{a_{GdH}^2}{D_{GdH}} \quad [29]$$

$a_{GdH}$  is the distance of closes approach and  $D_{GdH}$  is the diffusion coefficient for the diffusion of a water proton relative to the Gd(III) complex.

Electron spin relaxation:

The longitudinal and transverse electronic relaxation rates,  $1/T_{1e}$  and  $1/T_{2e}$  are described by Solomon-Bloembergen-Morgan theory modified by Powell (Eqs. [30]-[31]), where  $\tau_V$  is the correlation time for the modulation of the zero-field-splitting interaction.

$$\left( \frac{1}{T_{1e}} \right)^{ZFS} = \frac{1}{25} \Delta^2 \tau_V \{4S(S+1) - 3\} \left( \frac{1}{1 + \omega_S^2 \tau_V^2} + \frac{4}{1 + 4\omega_S^2 \tau_V^2} \right) \quad [30]$$

$$\left( \frac{1}{T_{2e}} \right)^{ZFS} = \Delta^2 \tau_V \left( \frac{5.26}{1 + 0.372\omega_S^2 \tau_V^2} + \frac{7.18}{1 + 1.24\omega_S^2 \tau_V^2} \right) \quad [31]$$

Temperature dependences of water exchange rates and correlation times:

The exchange rates are supposed to follow the Eyring equation. In Eq. [32]  $\Delta S^\ddagger$  and  $\Delta H^\ddagger$  are the entropy and enthalpy of activation for the water exchange process, and  $k_{ex}^{298}$  is the exchange rate at 298.15 K. In Eq. [33]  $\Delta H^{\ddagger,2nd}$  is the enthalpy of activation for the second sphere water exchange process and  $k_{ex}^{2nd,298}$  is the corresponding exchange rate at 298 K.

$$k_{ex} = \frac{1}{\tau_m} = \frac{k_B T}{h} \exp \left\{ \frac{\Delta S^\ddagger}{R} - \frac{\Delta H^\ddagger}{RT} \right\} = \frac{k_{ex}^{298} T}{298.15} \exp \left\{ \frac{\Delta H^\ddagger}{R} \left( \frac{1}{298.15} - \frac{1}{T} \right) \right\} \quad [32]$$

$$k_{ex}^{2nd} = \frac{k_{ex}^{2nd,298}}{298.14} \exp \left\{ \frac{\Delta H^{\ddagger 2nd}}{T} \left( \frac{1}{298.15} - \frac{1}{T} \right) \right\} \quad [33]$$

All correlation times and the diffusion constant are supposed to obey an Arrhenius law:

$$\tau = \tau^{298} \exp \left\{ \frac{E_a}{R} \left( \frac{1}{T} - \frac{1}{298.15} \right) \right\} \quad [34]$$

$$D_{GdH} = D_{GdH}^{298} \exp \left\{ \frac{E_{GdH}}{R} \left( \frac{1}{298.15} - \frac{1}{T} \right) \right\} \quad [35]$$

**Table S1.** Proton relaxivities ( $r_1 / \text{mM}^{-1}\text{s}^{-1}$ ) of  $\text{Gd}_2\text{L}^1$  in the absence of  $\text{Ca}^{2+}$ ,  $c(\text{Gd}^{3+})=5.1 \text{ mM}$ ,  $\text{pH}=6.25$ , at 25 and 37°C.

| $\nu (^1\text{H})/\text{MHz}$ | 15.5°C | 25°C | 37°C |
|-------------------------------|--------|------|------|
| 0.010                         | 10.0   | 7.45 | 5.89 |
| 0.0144                        | -      | 7.43 | 5.86 |
| 0.0208                        | -      | 7.46 | 5.84 |
| 0.0216                        | 9.91   | -    | -    |
| 0.0298                        | -      | 7.47 | 5.87 |
| 0.0428                        | -      | 7.46 | 5.86 |
| 0.0465                        | 9.88   | -    | -    |
| 0.0616                        | -      | 7.49 | 5.88 |
| 0.0887                        | -      | 7.47 | 5.85 |
| 0.10                          | 9.85   | -    | -    |
| 0.127                         | -      | 7.50 | 5.89 |
| 0.183                         | -      | 7.45 | 5.80 |
| 0.216                         | 9.83   | -    | -    |
| 0.264                         | -      | 7.44 | 5.85 |
| 0.379                         | -      | 7.40 | 5.81 |
| 0.465                         | 9.35   | -    | -    |
| 0.546                         | -      | 7.30 | 5.76 |
| 0.784                         | -      | 7.27 | 5.74 |
| 1.00                          | 9.14   | -    | -    |
| 1.13                          | -      | 7.11 | 5.65 |
| 1.62                          | -      | 6.92 | 5.45 |
| 2.15                          | 8.65   | -    | -    |
| 2.34                          | -      | 6.72 | 5.29 |
| 3.36                          | -      | 6.40 | 5.08 |
| 4.64                          | 7.80   | -    | -    |
| 4.83                          | -      | 6.19 | 4.83 |
| 6.95                          | -      | 5.98 | 4.62 |
| 10                            | 7.56   | 5.72 | 4.24 |
| 12                            | -      | 5.64 | 4.12 |
| 14                            | -      | 5.59 | -    |
| 16                            | -      | 5.56 | 4.01 |
| 18                            | -      | 5.55 | -    |
| 20                            | -      | 5.74 | 4.09 |
| 30                            | -      | 5.94 | 4.14 |
| 40                            | -      | 5.93 | 4.10 |
| 60                            | -      | 5.95 | 4.07 |
| 200                           | -      | 5.14 | 3.95 |
| 500                           | -      | 3.40 | -    |

**Table S2.** Proton relaxivities ( $r_1 / \text{mM}^{-1}\text{s}^{-1}$ ) of  $\text{Gd}_2\text{L}^1$  in the presence of  $\text{Ca}^{2+}$ ,  $c(\text{Gd}^{3+})=3.2 \text{ mM}$ ,  $c(\text{Ca}^{2+})=4.4 \text{ mM}$ ,  $\text{pH}=7$ , at 15.5, 25 and 37°C.

| $\nu (^1\text{H})/\text{MHz}$ | 15.5°C | 25°C |
|-------------------------------|--------|------|
| 0.010                         | 11.56  | 8.10 |
| 0.0144                        | -      | 8.10 |
| 0.0208                        | -      | 8.10 |
| 0.0298                        | -      | 8.10 |
| 0.0398                        | 11.01  | -    |
| 0.0428                        | -      | 8.10 |
| 0.0616                        | -      | 8.10 |
| 0.0887                        | -      | 8.10 |
| 0.127                         | -      | 8.10 |
| 0.158                         | 11.17  | -    |
| 0.183                         | -      | 8.10 |
| 0.264                         | -      | 8.00 |
| 0.379                         | -      | 8.00 |
| 0.546                         | -      | 7.97 |
| 0.784                         | -      | 7.82 |
| 1.13                          | -      | 7.65 |
| 1.62                          | -      | 7.44 |
| 2.34                          | -      | 7.16 |
| 2.51                          | 9.49   | -    |
| 3.36                          | -      | 6.88 |
| 4.83                          | -      | 6.56 |
| 6.95                          | -      | 6.40 |
| 10                            | 8.7    | 6.19 |
| 11.5                          | -      | 6.08 |
| 13.2                          | -      | 5.97 |
| 14                            | -      | -    |
| 15.2                          | -      | 5.97 |
| 16                            | -      | -    |
| 17.0                          | -      | -    |
| 17.4                          | -      | 5.95 |
| 20                            | -      | 6.13 |
| 30                            | -      | 6.39 |
| 40                            | -      | 6.38 |
| 60                            | -      | 6.31 |
| 200                           | -      | 5.76 |
| 500                           | -      | 3.98 |

**Table S3.** Variable temperature reduced transverse and longitudinal  $^{17}\text{O}$  relaxation rates of  $\text{Gd}_2\text{L}^1$  in the absence of  $\text{Ca}^{2+}$ ,  $c(\text{Gd}^{3+})=51.8$  mM,  $\text{pH}=7$ ,  $P_m=4.00\cdot 10^{-4}$  at 11.75 T. Reference was acidified  $\text{H}_2\text{O}$ ,  $\text{pH}=3.4$ .

| $t / ^\circ\text{C}$ | $T / \text{K}$ | $1000/T / \text{K}^{-1}$ | $P_m$    | $T_1 (\text{Gd})/\text{s}$ | $T_1 (\text{ref})/\text{s}$ | $T_2(\text{Gd})/\text{s}$ | $T_2(\text{ref})/\text{s}$ | $\ln(1/T_{1r})$ | $\ln(1/T_{2r})$ |
|----------------------|----------------|--------------------------|----------|----------------------------|-----------------------------|---------------------------|----------------------------|-----------------|-----------------|
| 3.75                 | 276.9          | 3.61                     | 4.00E-04 | 2.93E-03                   | 3.65E-03                    | 2.09E-03                  | 3.29E-03                   | 12.03           | 12.98           |
| 10.45                | 283.6          | 3.53                     | 4.00E-04 | 3.74E-03                   | 4.51E-03                    | 2.02E-03                  | 4.66E-03                   | 11.64           | 13.46           |
| 16.65                | 289.8          | 3.45                     | 4.00E-04 | 4.26E-03                   | 5.66E-03                    | 2.04E-03                  | 5.70E-03                   | 11.88           | 13.57           |
| 25.45                | 298.6          | 3.35                     | 4.00E-04 | 5.65E-03                   | 7.06E-03                    | 2.36E-03                  | 6.74E-03                   | 11.39           | 13.44           |
| 35.45                | 308.6          | 3.24                     | 4.00E-04 | 7.03E-03                   | 8.92E-03                    | 2.75E-03                  | 8.88E-03                   | 11.23           | 13.35           |
| 46.75                | 319.9          | 3.13                     | 4.00E-04 | 9.07E-03                   | 1.16E-02                    | 3.42E-03                  | 1.18E-02                   | 10.99           | 13.16           |
| 59.25                | 332.4          | 3.01                     | 4.00E-04 | 1.20E-02                   | 1.45E-02                    | 4.83E-03                  | 1.43E-02                   | 10.47           | 12.75           |
| 70.55                | 343.7          | 2.91                     | 4.00E-04 | 1.45E-02                   | 1.75E-02                    | 6.37E-03                  | 1.72E-02                   | 10.27           | 12.42           |

**Table S4.** Variable temperature reduced transverse and longitudinal  $^{17}\text{O}$  relaxation rates of  $\text{Gd}_2\text{L}^1$  in the presence of 1M  $\text{Ca}^{2+}$ ,  $c(\text{Gd}^{3+})=45.6$  mM,  $\text{pH}=7$ ,  $P_m=5.41\cdot 10^{-4}$  at 11.75 T. Reference was acidified 1M  $\text{CaCl}_2$ .

| $t / ^\circ\text{C}$ | $T / \text{K}$ | $1000/T / \text{K}^{-1}$ | $P_m$    | $T_1 (\text{Gd})/\text{s}$ | $T_1 (\text{ref})/\text{s}$ | $T_2(\text{Gd})/\text{s}$ | $T_2(\text{ref})/\text{s}$ | $\ln(1/T_{1r})$ | $\ln(1/T_{2r})$ |
|----------------------|----------------|--------------------------|----------|----------------------------|-----------------------------|---------------------------|----------------------------|-----------------|-----------------|
| 4.25                 | 277.4          | 3.60                     | 5.41E-04 | 2.56E-03                   | 4.14E-03                    | 1.36E-03                  | 4.08E-03                   | 12.38           | 13.71           |
| 10.55                | 283.7          | 3.52                     | 5.41E-04 | 2.86E-03                   | 5.06E-03                    | 1.39E-03                  | 4.93E-03                   | 12.25           | 13.77           |
| 17.95                | 291.1          | 3.44                     | 5.41E-04 | 3.78E-03                   | 6.16E-03                    | 1.46E-03                  | 5.97E-03                   | 12.09           | 13.77           |
| 24.85                | 298.0          | 3.36                     | 5.41E-04 | 4.05E-03                   | 7.24E-03                    | 1.45E-03                  | 6.76E-03                   | 11.94           | 13.81           |
| 34.15                | 307.3          | 3.25                     | 5.41E-04 | 5.23E-03                   | 9.16E-03                    | 1.67E-03                  | 8.94E-03                   | 11.76           | 13.71           |
| 50.35                | 323.5          | 3.09                     | 5.41E-04 | 6.98E-03                   | 1.29E-02                    | 1.95E-03                  | 1.17E-02                   | 11.44           | 13.58           |
| 65.25                | 338.4          | 2.96                     | 5.41E-04 | 8.85E-03                   | 1.66E-02                    | 2.48E-03                  | 1.59E-02                   | 11.16           | 13.35           |



**Table S5.** Relaxometric Ca<sup>2+</sup> titration of Gd<sub>2</sub>L<sup>1</sup> at 25°C, pH 7 and 11.75 T.

| c(Gd <sup>3+</sup> ) / mM | c(Ca <sup>2+</sup> ) / mM | c(complex) / mM | n(Ca <sup>2+</sup> ):n(complex) | T <sub>1</sub> / ms | r <sub>1</sub> / mmol <sup>-1</sup> s <sup>-1</sup> |
|---------------------------|---------------------------|-----------------|---------------------------------|---------------------|-----------------------------------------------------|
| 7.4                       | 0                         | 3.7             | 0.00                            | 39.67               | 3.36                                                |
| 7.05                      | 0.88                      | 3.525           | 0.25                            | 40.90               | 3.42                                                |
| 6.73                      | 1.67                      | 3.365           | 0.50                            | 42.51               | 3.44                                                |
| 6.43                      | 2.4                       | 3.215           | 0.75                            | 43.97               | 3.48                                                |
| 6.08                      | 3.28                      | 3.04            | 1.08                            | 46.04               | 3.51                                                |
| 5.77                      | 4.06                      | 2.885           | 1.41                            | 48.31               | 3.52                                                |
| 5.62                      | 8.9                       | 2.81            | 3.17                            | 48.92               | 3.57                                                |
| 5.41                      | 15.72                     | 2.705           | 5.81                            | 49.90               | 3.64                                                |
| 5.22                      | 22.05                     | 2.61            | 8.45                            | 51.35               | 3.66                                                |
| 4.99                      | 43.56                     | 2.495           | 17.46                           | 53.03               | 3.71                                                |
| 4.77                      | 63.23                     | 2.385           | 26.51                           | 53.40               | 3.85                                                |
| 4.58                      | 81.27                     | 2.29            | 35.49                           | 56.16               | 3.81                                                |
| 4.4                       | 97.88                     | 2.2             | 44.49                           | 58.63               | 3.79                                                |
| 4.07                      | 127.44                    | 2.035           | 62.62                           | 63.36               | 3.79                                                |
| 3.79                      | 152.96                    | 1.895           | 80.72                           | 67.45               | 3.82                                                |
| 3.552                     | 175.22                    | 1.776           | 98.66                           | 71.79               | 3.82                                                |
| 3.24                      | 203.73                    | 1.62            | 125.76                          | 77.92               | 3.85                                                |

**Table S6.** Relaxometric Ca<sup>2+</sup> titration of Gd<sub>2</sub>L<sup>2</sup> at 25°C, pH 7 and 11.75 T.

| c(Gd <sup>3+</sup> ) / mM | c(Ca <sup>2+</sup> ) / mM | c(complex) / mM | n(Ca <sup>2+</sup> ):n(complex) | T <sub>1</sub> / ms | r <sub>1</sub> / mmol <sup>-1</sup> s <sup>-1</sup> |
|---------------------------|---------------------------|-----------------|---------------------------------|---------------------|-----------------------------------------------------|
| 4.03                      | 0                         | 2.015           | 0                               | 91.51               | 2.62                                                |
| 3.78                      | 1.15                      | 1.89            | 0.61                            | 94.04               | 2.72                                                |
| 3.56                      | 2.16                      | 1.78            | 1.21                            | 99.00               | 2.73                                                |
| 3.224                     | 3.68                      | 1.612           | 2.28                            | 104.7               | 2.85                                                |
| 3.06                      | 4.43                      | 1.53            | 2.90                            | 113.5               | 2.76                                                |
| 2.91                      | 5.10                      | 1.455           | 3.51                            | 117.3               | 2.80                                                |
| 2.63                      | 6.40                      | 1.315           | 4.87                            | 128.0               | 2.83                                                |
| 2.52                      | 14.3                      | 1.26            | 11.35                           | 131.1               | 2.88                                                |
| 2.33                      | 28.2                      | 1.165           | 24.21                           | 140.5               | 2.89                                                |
| 2.16                      | 61.9                      | 1.08            | 57.31                           | 151.5               | 2.89                                                |

**Table S7.** Relaxometric Mg<sup>2+</sup> titration of Gd<sub>2</sub>L<sup>1</sup> at 25°C, pH 7 and 11.75 T.

| c(Gd <sup>3+</sup> ) / mM | c(Mg <sup>2+</sup> ) / mM | c(Ca <sup>2+</sup> ) / mM | c(complex) / mM | n(Mg <sup>2+</sup> ):n(complex) | n(Ca <sup>2+</sup> ):n(complex) | r <sub>1</sub> / mmol <sup>-1</sup> s <sup>-1</sup> |
|---------------------------|---------------------------|---------------------------|-----------------|---------------------------------|---------------------------------|-----------------------------------------------------|
| 2.60                      | 0                         | 0                         | 1.30            | 0.00                            | 0.00                            | 3.35                                                |
| 2.57                      | 1.21                      | 0                         | 1.29            | 0.94                            | 0.00                            | 3.37                                                |
| 2.54                      | 2.38                      | 0                         | 1.27            | 1.87                            | 0.00                            | 3.37                                                |
| 2.48                      | 4.65                      | 0                         | 1.24            | 3.75                            | 0.00                            | 3.34                                                |
| 2.42                      | 6.82                      | 0                         | 1.21            | 5.64                            | 0.00                            | 3.41                                                |
| 2.34                      | 9.88                      | 0                         | 1.17            | 8.44                            | 0.00                            | 3.36                                                |
| 2.26                      | 12.74                     | 0                         | 1.13            | 11.27                           | 0.00                            | 3.51                                                |
| 2.17                      | 16.28                     | 0                         | 1.09            | 15.00                           | 0.00                            | 3.45                                                |
| 2.08                      | 19.54                     | 0                         | 1.04            | 18.79                           | 0.00                            | 3.43                                                |
| 2.00                      | 22.55                     | 0                         | 1.00            | 22.55                           | 0.00                            | 3.47                                                |
| 1.96                      | 22.12                     | 1.86                      | 0.98            | 22.57                           | 1.90                            | 3.54                                                |
| 1.93                      | 21.71                     | 3.66                      | 0.97            | 22.50                           | 3.79                            | 3.53                                                |
| 1.86                      | 20.94                     | 7.05                      | 0.93            | 22.52                           | 7.58                            | 3.59                                                |
| 1.79                      | 20.21                     | 10.21                     | 0.895           | 22.58                           | 11.41                           | 3.70                                                |
| 1.73                      | 19.54                     | 13.16                     | 0.865           | 22.59                           | 15.21                           | 3.71                                                |
| 1.68                      | 18.91                     | 15.92                     | 0.840           | 22.51                           | 18.95                           | 3.76                                                |
| 1.625                     | 18.32                     | 18.51                     | 0.813           | 22.55                           | 22.78                           | 3.78                                                |
| 1.58                      | 17.76                     | 20.94                     | 0.790           | 22.48                           | 26.51                           | 3.81                                                |
| 1.51                      | 16.99                     | 24.3                      | 0.755           | 22.50                           | 32.19                           | 3.86                                                |
| 1.42                      | 16.06                     | 28.39                     | 0.710           | 22.62                           | 39.99                           | 3.92                                                |
| 1.30                      | 14.655                    | 34.55                     | 0.650           | 22.55                           | 53.15                           | 3.90                                                |

**Table S8.** Luminescence lifetimes measurements on  $\text{Eu}_2\text{L}^1$  at  $25^\circ\text{C}$ , pH neutral, and the calculated hydration numbers  $q$ .

| $n(\text{Ca}^{2+}):n(\text{complex})$ | $\tau_{\text{H}_2\text{O}} / \text{ms}$ | $\tau_{\text{D}_2\text{O}} / \text{ms}$ | $q$  |
|---------------------------------------|-----------------------------------------|-----------------------------------------|------|
| 0                                     | 0.325                                   | 0.407                                   | 0.44 |
| 0                                     | 0.327                                   | 0.408                                   | 0.43 |
| 0                                     | 0.329                                   | 0.409                                   | 0.41 |
| 0                                     | 0.327                                   | 0.411                                   | 0.45 |
| 0                                     | 0.329                                   | 0.408                                   | 0.40 |
| 2                                     | 0.346                                   | 0.471                                   | 0.63 |
| 2                                     | 0.348                                   | 0.471                                   | 0.60 |
| 2                                     | 0.347                                   | 0.472                                   | 0.61 |
| 2                                     | 0.346                                   | 0.469                                   | 0.61 |
| 2                                     | 0.345                                   | 0.470                                   | 0.63 |
| 10                                    | 0.389                                   | 0.595                                   | 0.77 |
| 10                                    | 0.388                                   | 0.591                                   | 0.76 |
| 10                                    | 0.390                                   | 0.594                                   | 0.76 |
| 10                                    | 0.390                                   | 0.591                                   | 0.74 |
| 10                                    | 0.389                                   | 0.591                                   | 0.76 |
| 20                                    | 0.423                                   | 0.661                                   | 0.72 |
| 20                                    | 0.424                                   | 0.665                                   | 0.73 |
| 20                                    | 0.423                                   | 0.661                                   | 0.72 |
| 20                                    | 0.419                                   | 0.661                                   | 0.75 |
| 20                                    | 0.420                                   | 0.659                                   | 0.73 |
| 40                                    | 0.461                                   | 0.729                                   | 0.66 |
| 40                                    | 0.461                                   | 0.730                                   | 0.66 |
| 40                                    | 0.462                                   | 0.729                                   | 0.65 |
| 40                                    | 0.462                                   | 0.729                                   | 0.65 |
| 40                                    | 0.459                                   | 0.728                                   | 0.67 |
| 80                                    | 0.484                                   | 0.772                                   | 0.62 |
| 80                                    | 0.483                                   | 0.775                                   | 0.63 |
| 80                                    | 0.485                                   | 0.774                                   | 0.62 |
| 80                                    | 0.485                                   | 0.774                                   | 0.62 |
| 80                                    | 0.486                                   | 0.772                                   | 0.62 |

**Figure S1.** Variable  $\text{Ca}^{2+}$  concentration UV-Vis studies on  $\text{Eu}_2\text{L}^1$  at  $50^\circ\text{C}$ .

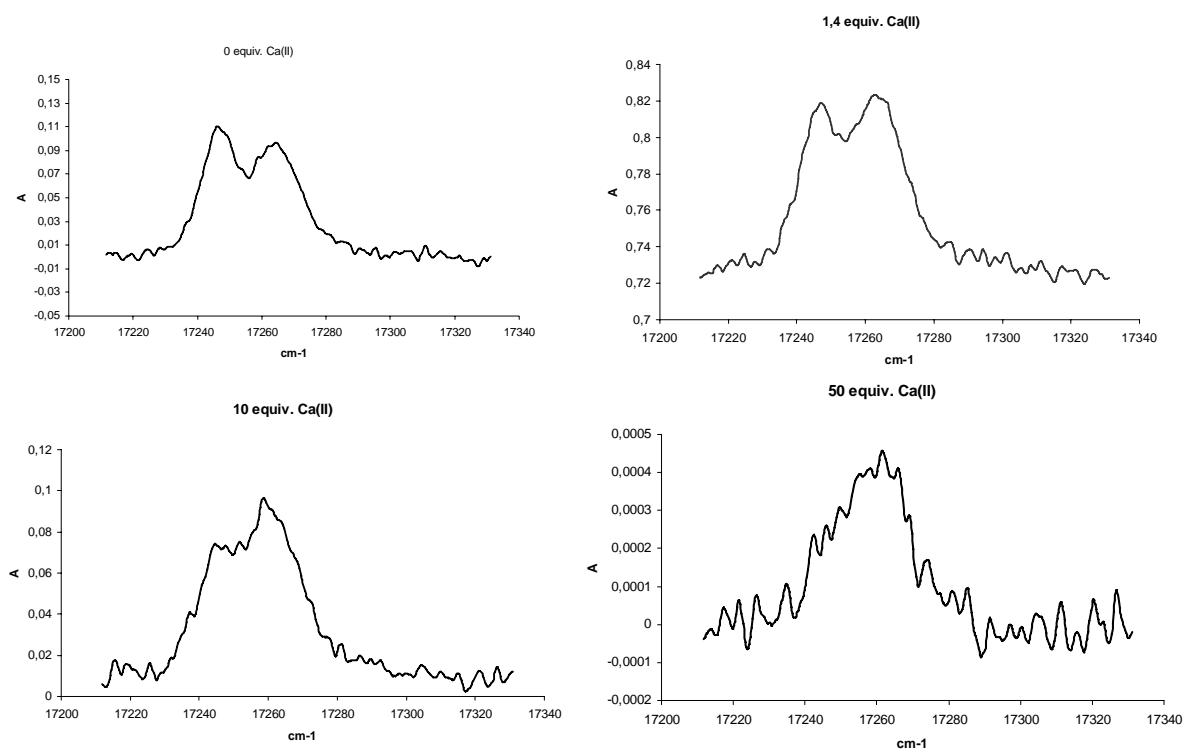

**Figure S2.** Variable  $\text{Ca}^{2+}$  concentration UV-Vis studies on  $\text{Eu}_2\text{L}^1$  at  $37^\circ\text{C}$ .

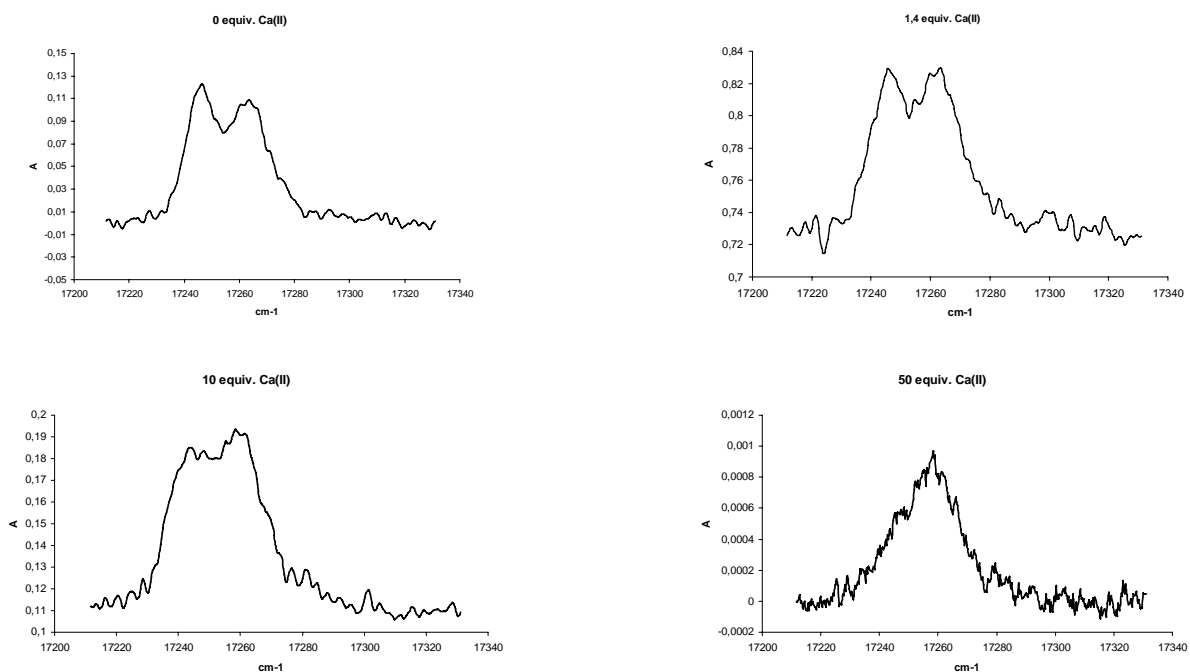

**Figure S3.** Variable  $\text{Ca}^{2+}$  concentration UV-Vis studies on  $\text{Eu}_2\text{L}^1$  at  $25^\circ\text{C}$ .

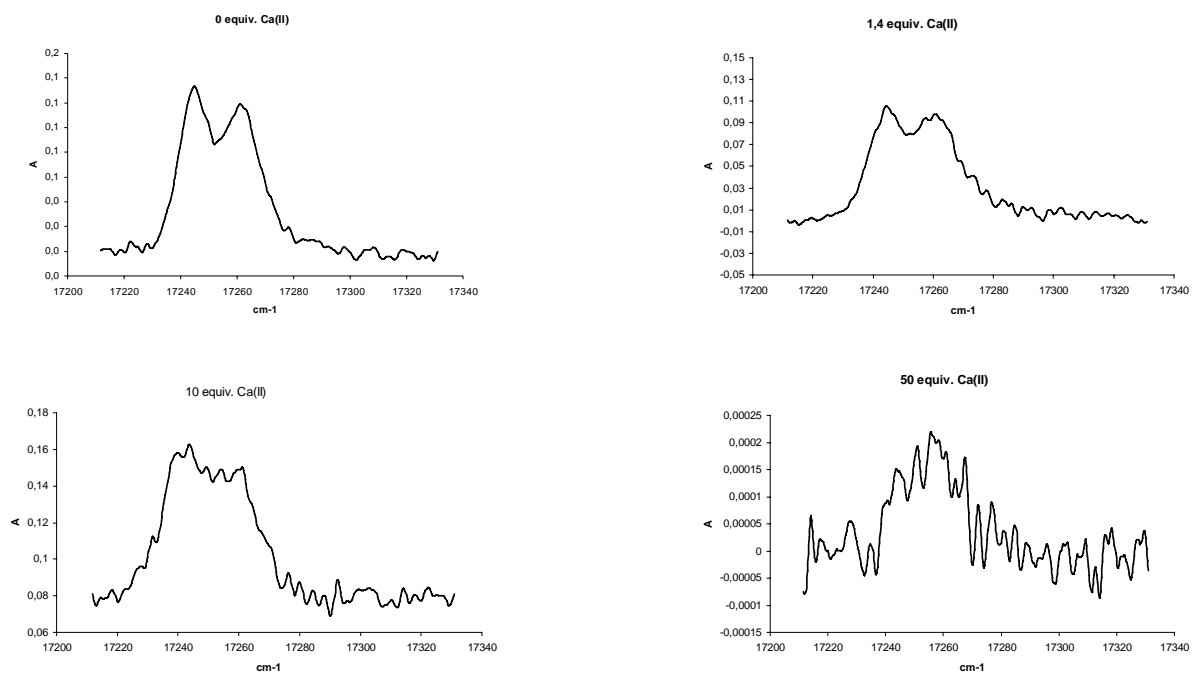

**Figure S4.** Variable  $\text{Ca}^{2+}$  concentration UV-Vis studies on  $\text{Eu}_2\text{L}^1$  at  $15.5^\circ\text{C}$ .

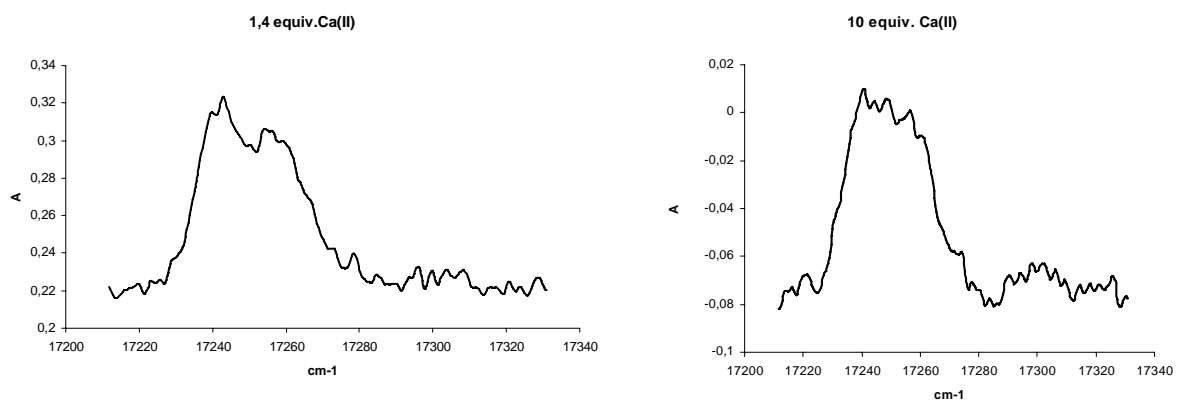

**Table S9.** Fitted parameters of Gd<sub>2</sub>L<sup>1</sup> in the absence of Ca<sup>2+</sup>. The underlined parameters were fixed during the fitting.

| Parameter                                                        | Gd <sub>2</sub> L <sup>1</sup> |
|------------------------------------------------------------------|--------------------------------|
| $k_{\text{ex}}^{298}$ [ $10^6 \text{ s}^{-1}$ ]                  | 2.4±0.2                        |
| $\Delta H^\ddagger$ [ $\text{kJ mol}^{-1}$ ]                     | 43.6±3.3                       |
| $\Delta S^\ddagger$ [ $\text{J mol}^{-1}\text{K}^{-1}$ ]         | +23.5                          |
| $A/\hbar$ [ $10^6 \text{ rad s}^{-1}$ ]                          | <u>-3.8</u>                    |
| $\tau_{\text{RO}}^{298}$ [ps]                                    | 349±47                         |
| $E_{\text{R}}$ [ $\text{kJ mol}^{-1}$ ]                          | 24±1                           |
| $\tau_{\text{V}}^{298}$ [ps]                                     | 20.6±2.7                       |
| $E_{\text{V}}$ [ $\text{kJ mol}^{-1}$ ]                          | <u>1</u>                       |
| $\Delta^2$ [ $10^{20} \text{ s}^{-2}$ ]                          | 0.46±0.10                      |
| $D_{\text{GdH}}^{298}$ [ $10^{-10} \text{ m}^2 \text{ s}^{-1}$ ] | 25±3                           |
| $E_{\text{DGdH}}$ [ $\text{kJ mol}^{-1}$ ]                       | 30±2                           |
| $\delta g_{\text{L}}^2$ [ $10^{-1}$ ]                            | 2.7±0.7                        |
| $\tau_{\text{RH}}^{298} / \tau_{\text{RO}}^{298}$                | 0.76±0.12                      |
| $r_{\text{GdO}}$ [ $\text{\AA}$ ]                                | <u>2.5</u>                     |
| $r_{\text{GdH}}$ [ $\text{\AA}$ ]                                | <u>3.1</u>                     |
| $r_{\text{GdHouter}}$ [ $\text{\AA}$ ]                           | <u>3.6</u>                     |
| $\chi(1+\eta^2/3)^{1/2}$ [MHz]                                   | <u>7.58</u>                    |
| q                                                                | <u>0.4</u>                     |
| q <sub>2nd</sub>                                                 | <u>1</u>                       |
| $\tau_{\text{M}}^{298}$ <sub>2nd</sub> [ps]                      | <u>50</u>                      |
| $\Delta H^{298}$ <sub>2nd</sub> [ $\text{kJ mol}^{-1}$ ]         | <u>35</u>                      |
| $r_{\text{GdH}}^{2\text{nd}}$ [ $\text{\AA}$ ]                   | <u>3.5</u>                     |
| $r_{\text{GdO}}^{2\text{nd}}$ [ $\text{\AA}$ ]                   | <u>4.1</u>                     |

**Table S10.** Fitted parameters of  $\text{Gd}_2\text{L}^1$  in the presence of 1M  $\text{Ca}^{2+}$ . The underlined parameters were fixed during the fitting.

| Parameter                                                | $\text{Gd}_2\text{L}^1 + \text{Ca}^{2+}$ |
|----------------------------------------------------------|------------------------------------------|
| $k_{\text{ex}}^{298}$ [ $10^6 \text{ s}^{-1}$ ]          | 7.5±1.6                                  |
| $\Delta H^\ddagger$ [ $\text{kJ mol}^{-1}$ ]             | <u>43.6</u>                              |
| $\Delta S^\ddagger$ [ $\text{J mol}^{-1}\text{K}^{-1}$ ] | +33.0                                    |
| $A/\hbar$ [ $10^6 \text{ rad s}^{-1}$ ]                  | <u>-3.8</u>                              |
| $\tau_{\text{RO}}^{298}$ [ps]                            | 1152±243                                 |
| $E_{\text{R}}$ [ $\text{kJ mol}^{-1}$ ]                  | 21±6                                     |
| $\tau_{\text{V}}^{298}$ [ps]                             | 0.13±0.02                                |
| $E_{\text{V}}$ [ $\text{kJ mol}^{-1}$ ]                  | <u>1</u>                                 |
| $\Delta^2$ [ $10^{20} \text{ s}^{-2}$ ]                  | 0.50±0.05                                |
| $\delta g_{\text{L}}^2$ [ $10^{-2}$ ]                    | <u>2.1</u>                               |
| $r_{\text{GdO}}$ [ $\text{\AA}$ ]                        | <u>2.5</u>                               |
| $r_{\text{GdH}}$ [ $\text{\AA}$ ]                        | <u>3.1</u>                               |
| $r_{\text{GdHouter}}$ [ $\text{\AA}$ ]                   | <u>3.5</u>                               |
| $\lambda(1+\eta^2/3)^{1/2}$ [MHz]                        | <u>7.58</u>                              |
| q                                                        | <u>0.7</u>                               |
| $q_{2\text{nd}}$                                         | <u>1</u>                                 |
| $\tau_{\text{M}}^{298}$ [ $2\text{nd}$ ] [ps]            | <u>50</u>                                |
| $\Delta H_{2\text{nd}}^{298}$ [ $\text{kJ mol}^{-1}$ ]   | <u>35</u>                                |
| $r_{\text{GdH}}^{2\text{nd}}$ [ $\text{\AA}$ ]           | <u>3.5</u>                               |
| $r_{\text{GdO}}^{2\text{nd}}$ [ $\text{\AA}$ ]           | <u>4.1</u>                               |

Figure S5. IR spectrum of the ligand L<sup>1</sup>.

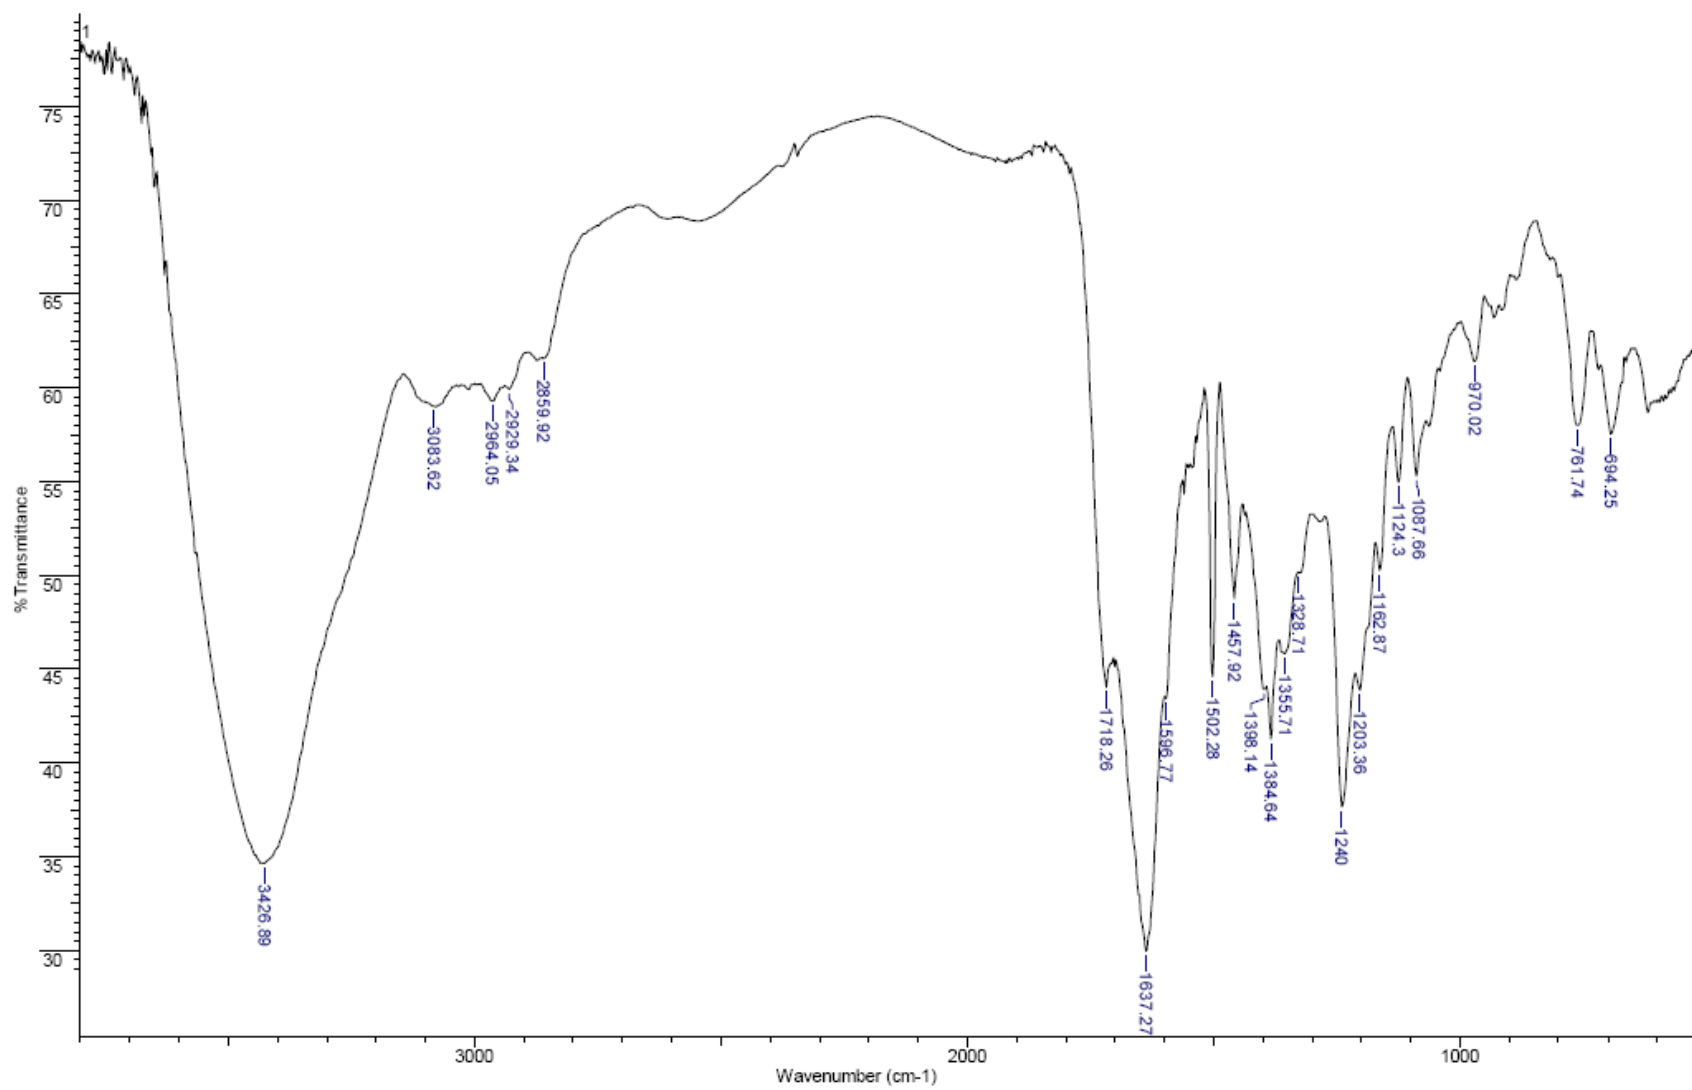



**Figure S6.** IR spectrum of Gd<sub>2</sub>L<sup>1</sup> complex.

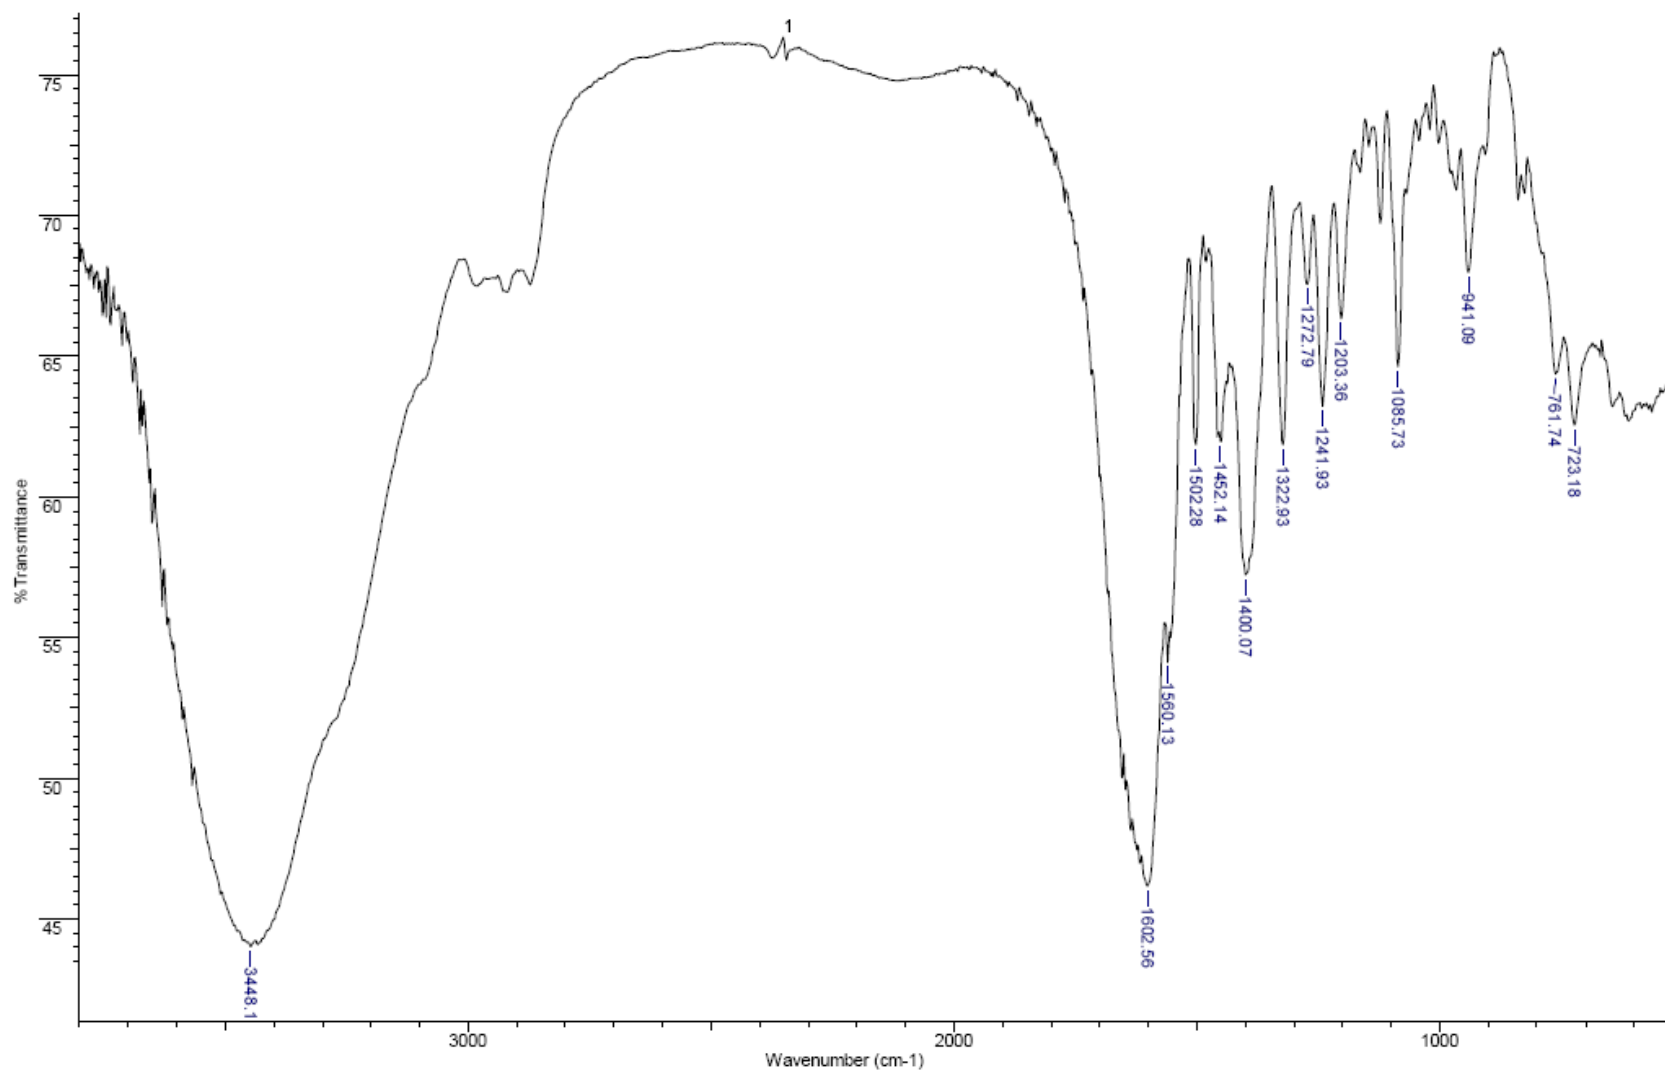

**Figure S7.**  $^1\text{H}$  NMR spectrum of the compound **6a**.

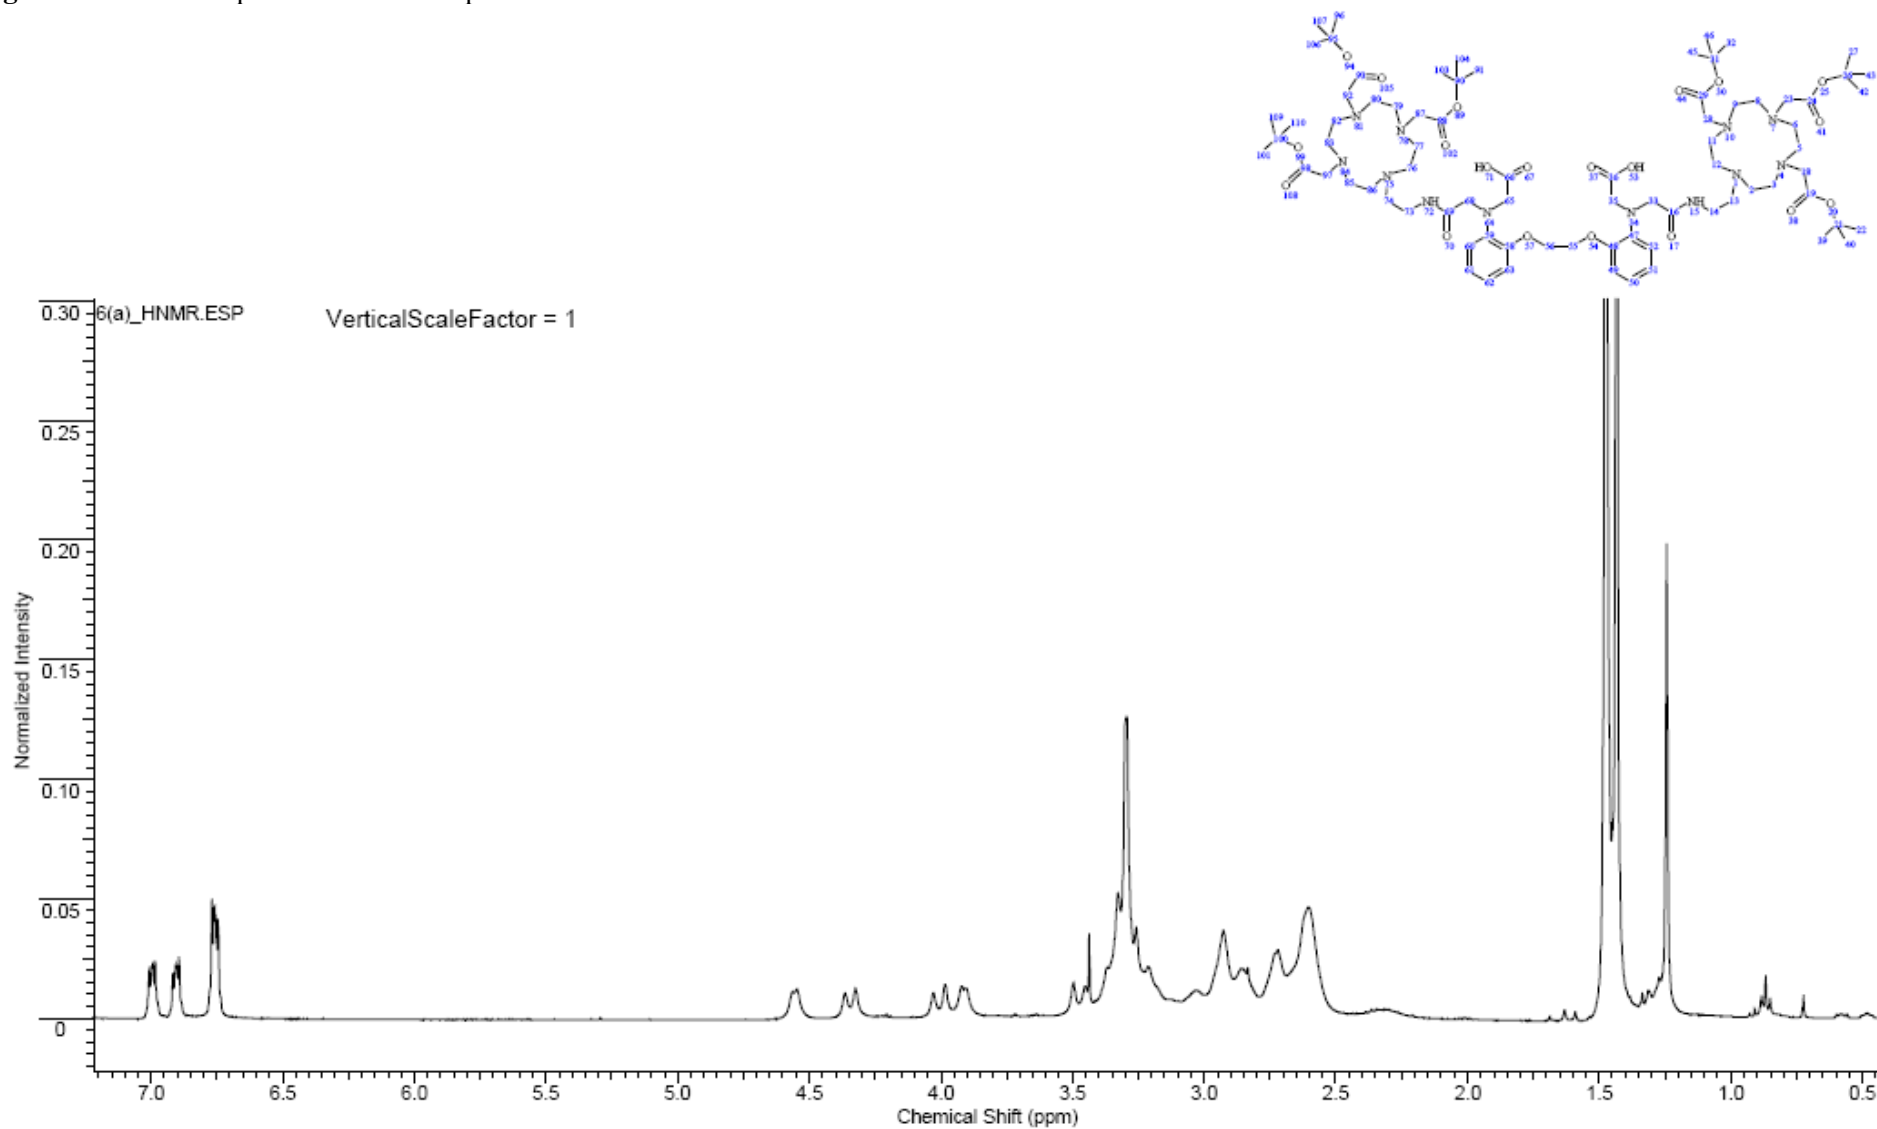

**Figure S8.**  $^{13}\text{C}$  NMR spectrum of the compound **6a**.

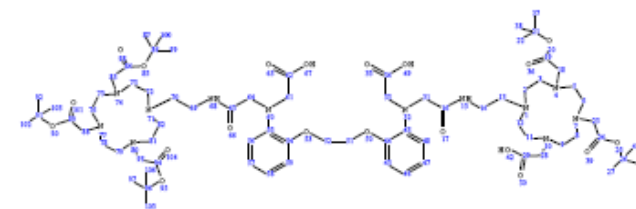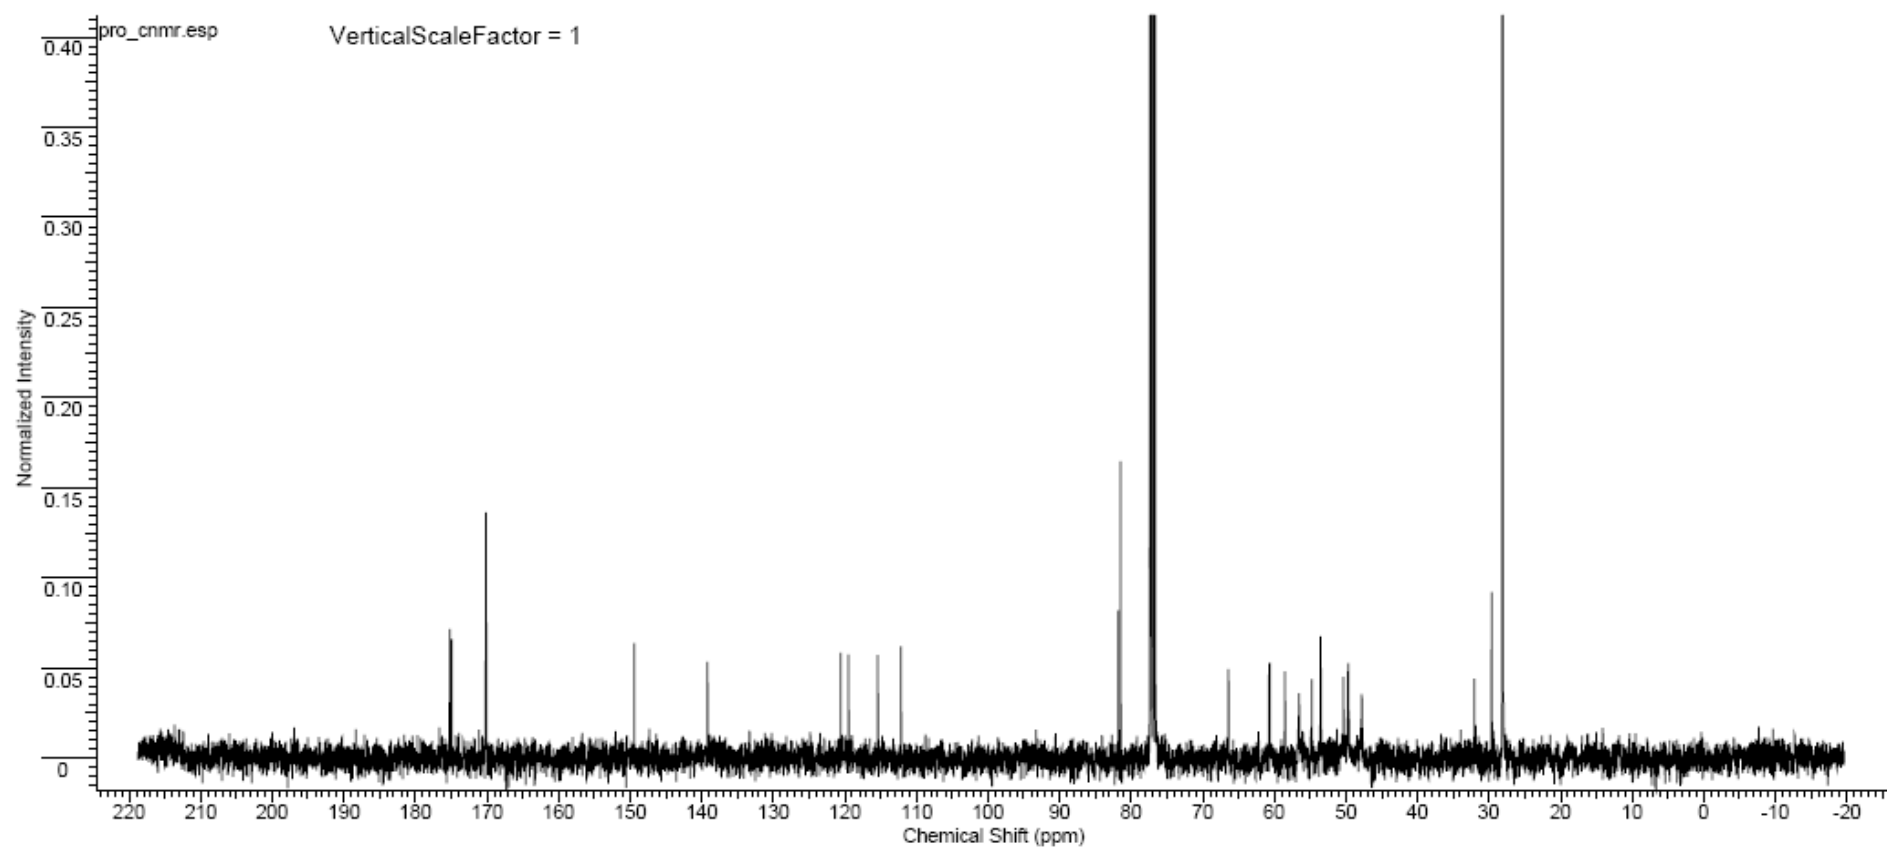

**Figure S9.**  $^1\text{H}$  NMR spectrum of the ligand  $\text{L}^1$ .

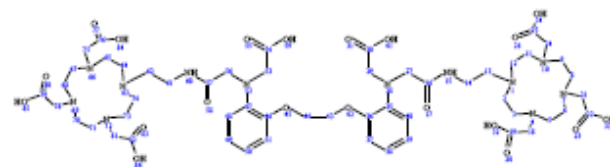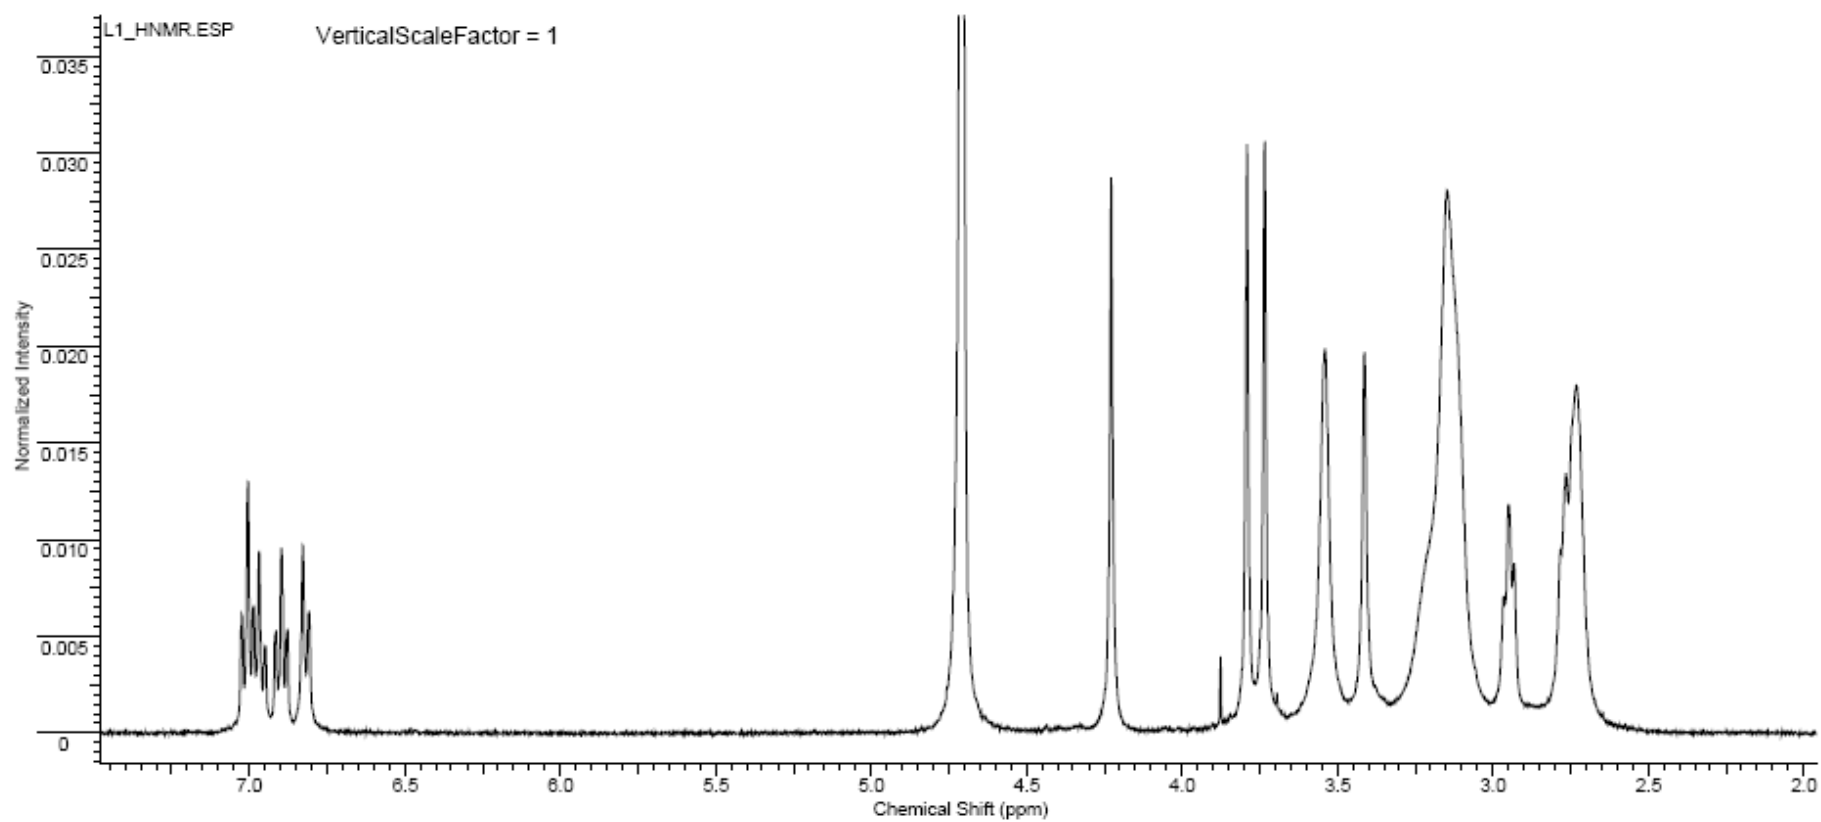

**Figure S10.**  $^{13}\text{C}$  NMR spectrum of the ligand  $\text{L}^1$ .

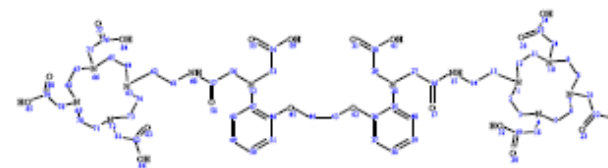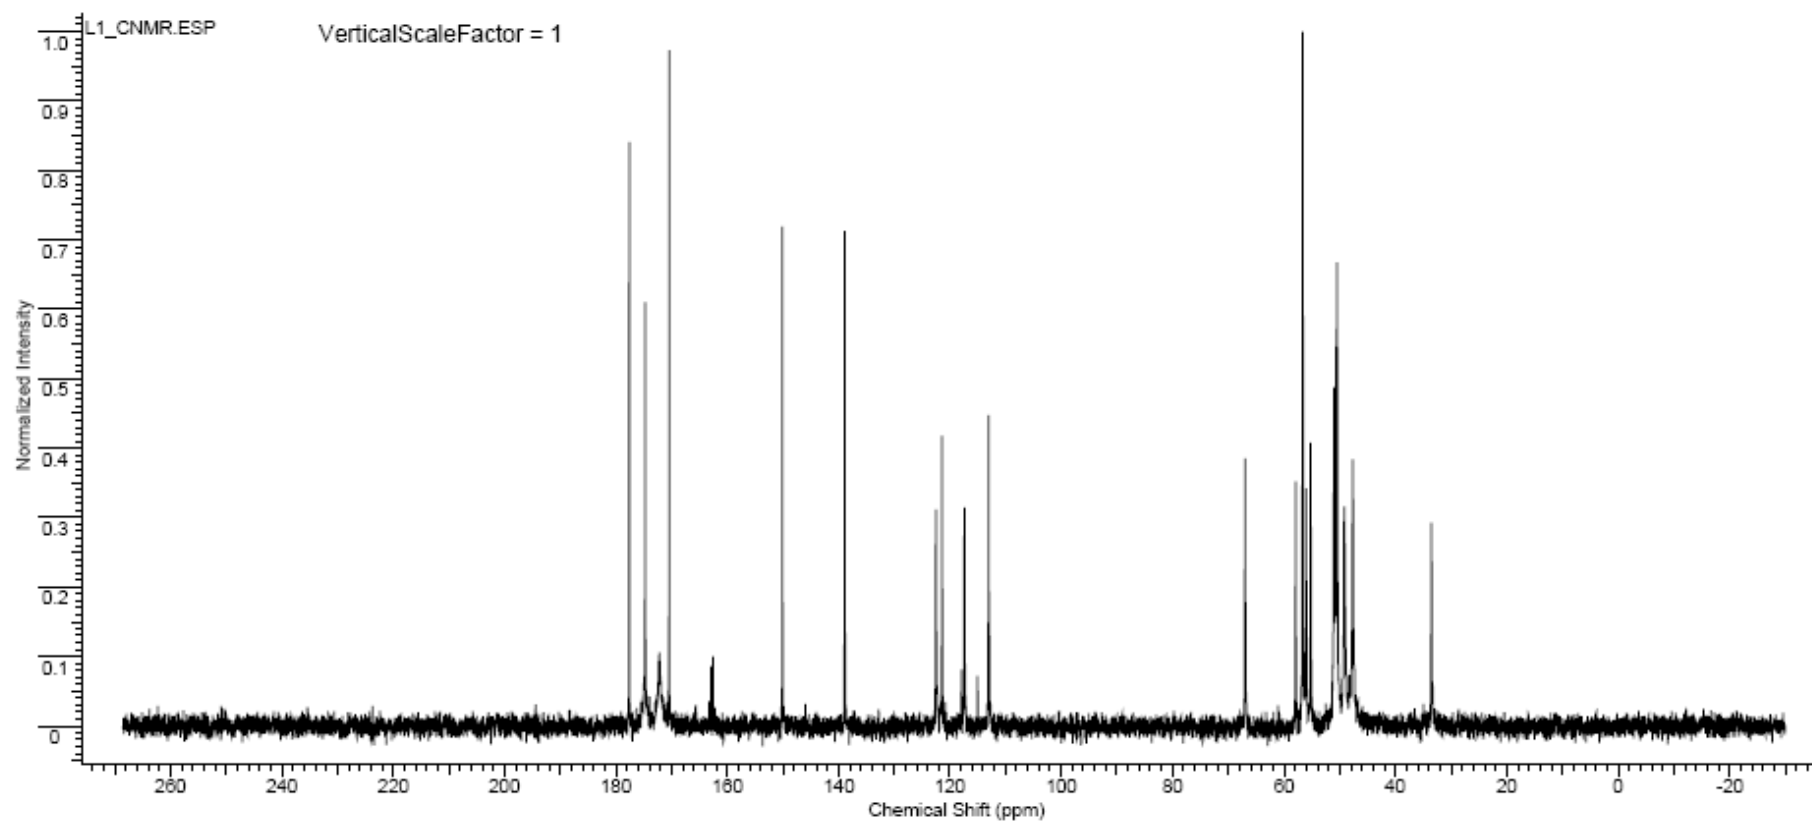

**Figure S11.**  $^1\text{H}$  NMR spectrum of the ligand  $\text{L}^2$ .

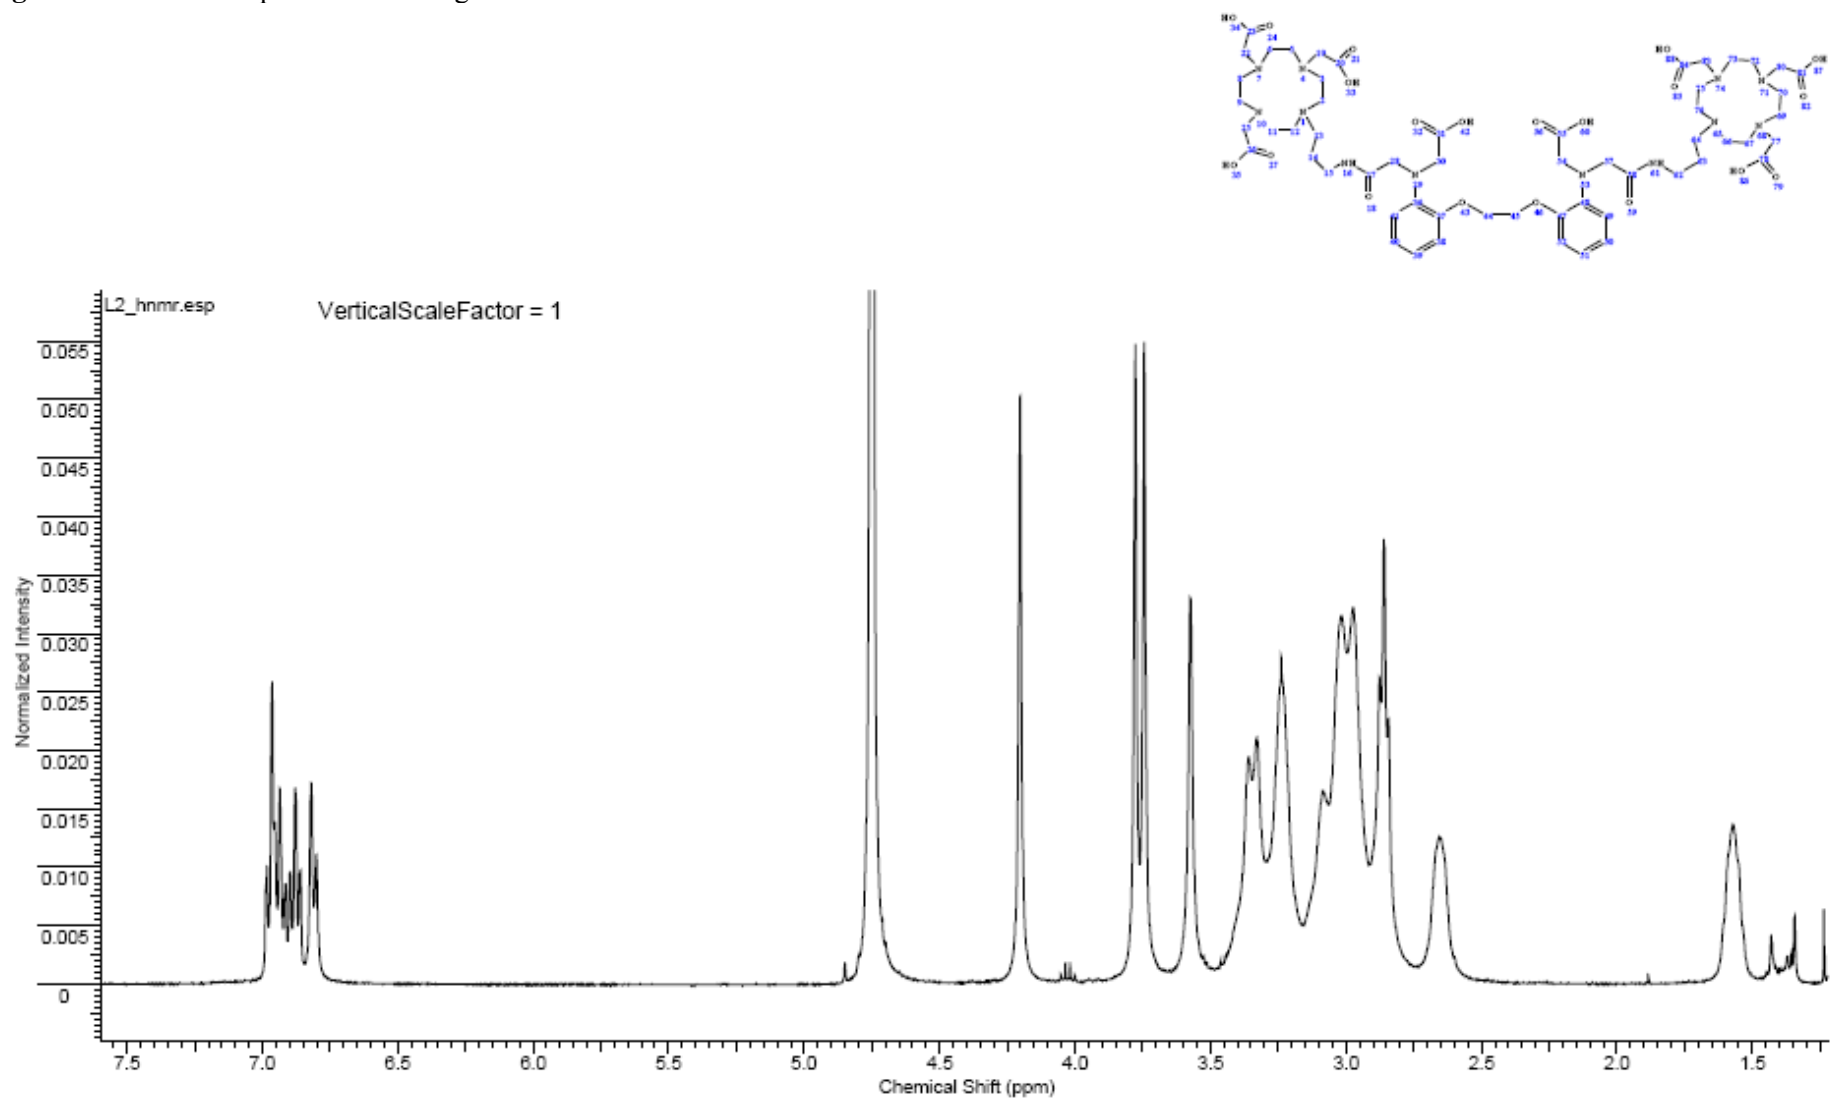

**Figure S12.**  $^{13}\text{C}$  NMR spectrum of the ligand  $\text{L}^2$ .

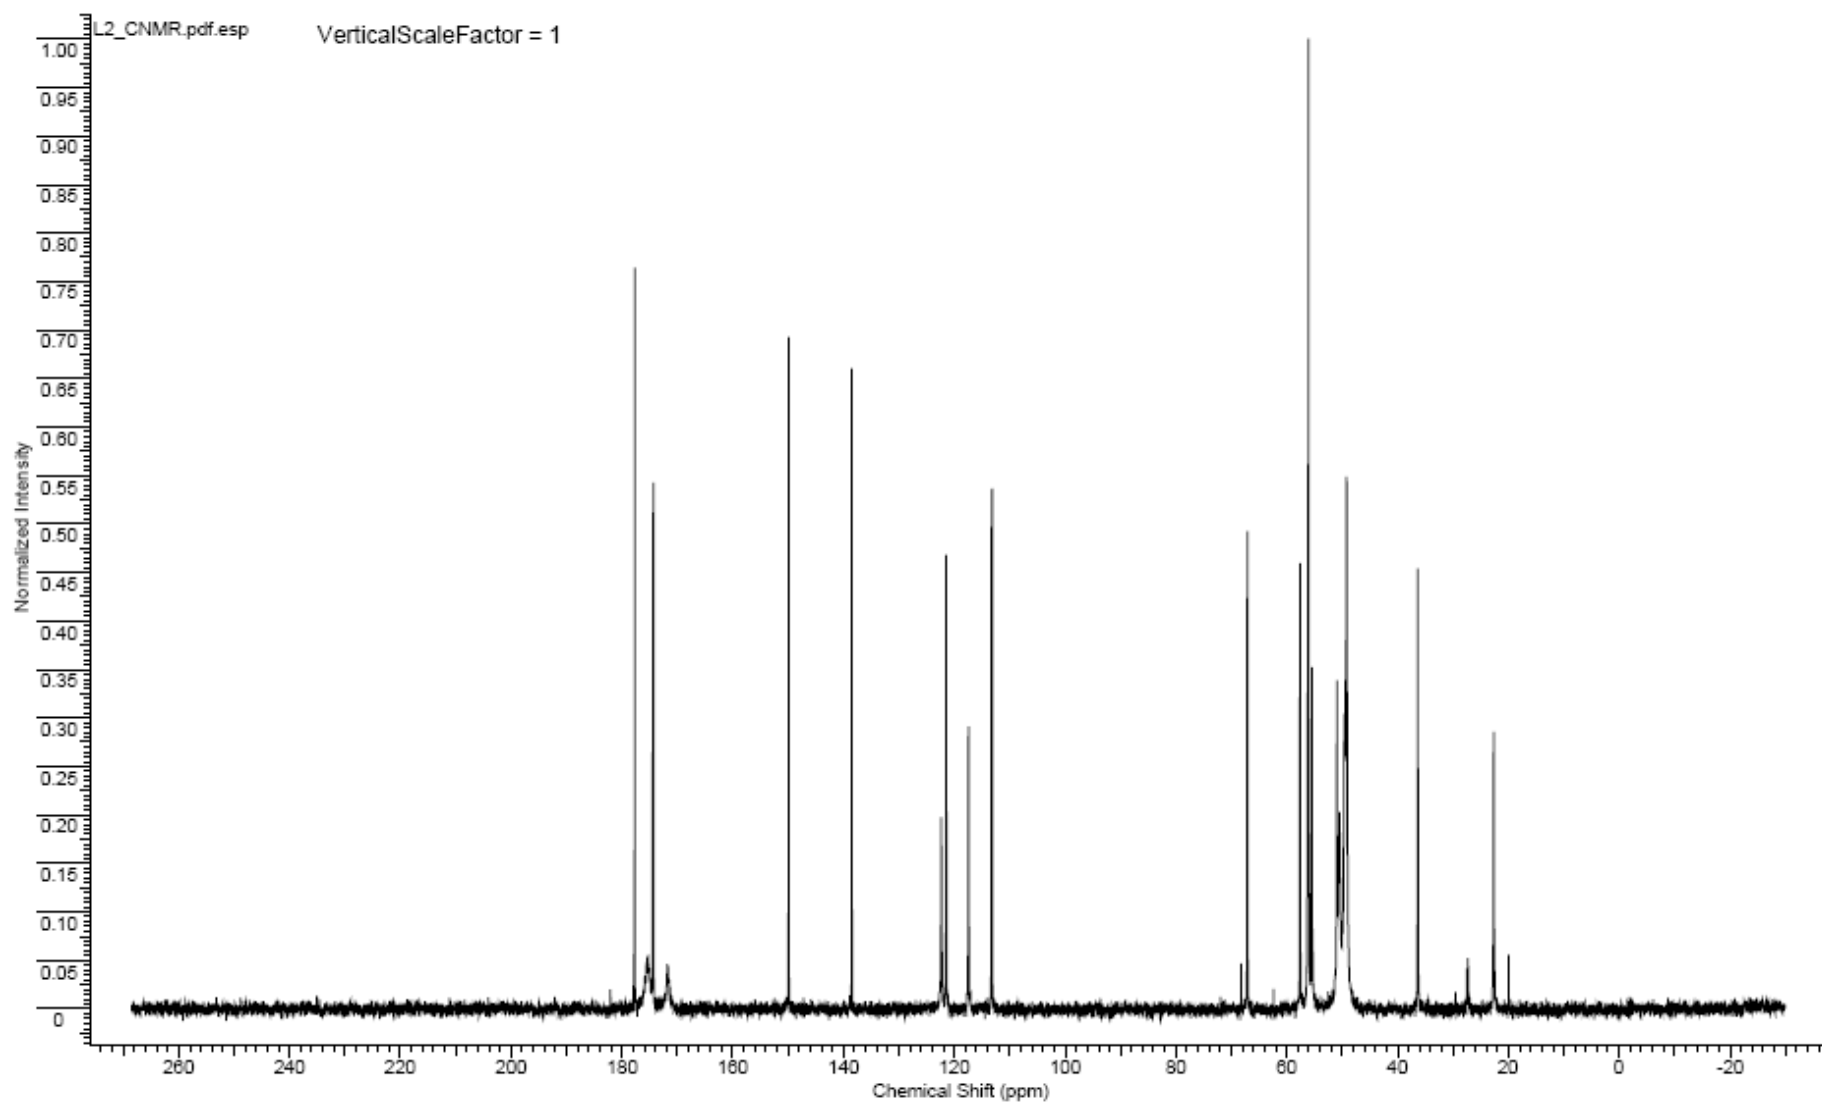

**Figure S13.**  $^1\text{H}$ - $^1\text{H}$  COSY spectrum of the compound 6a.

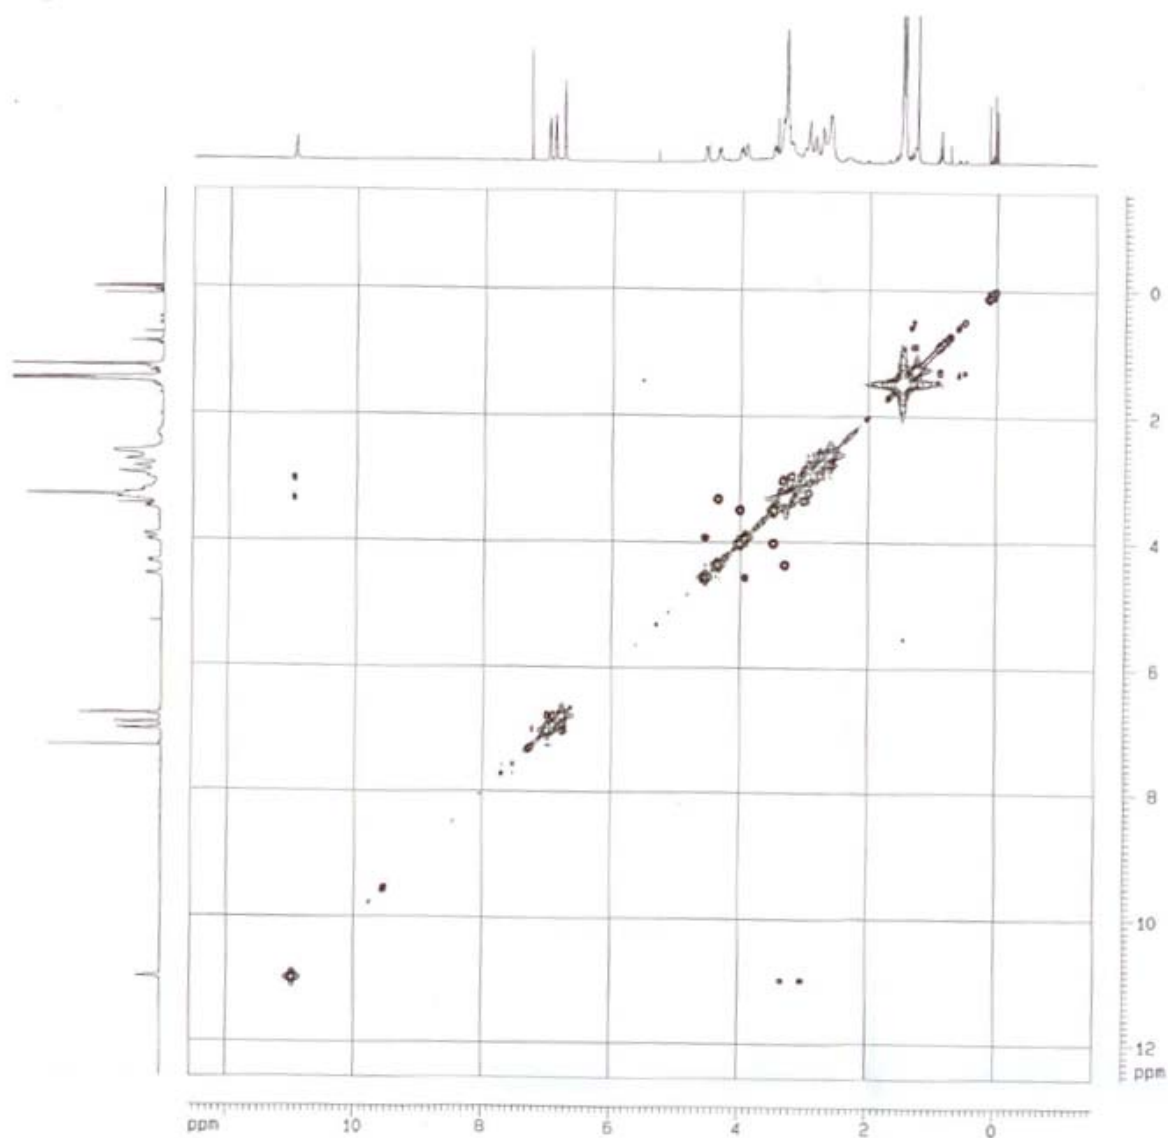



**Figure S14.**  $^1\text{H}$ - $^{13}\text{C}$  HSQC spectrum of the compound 6a.

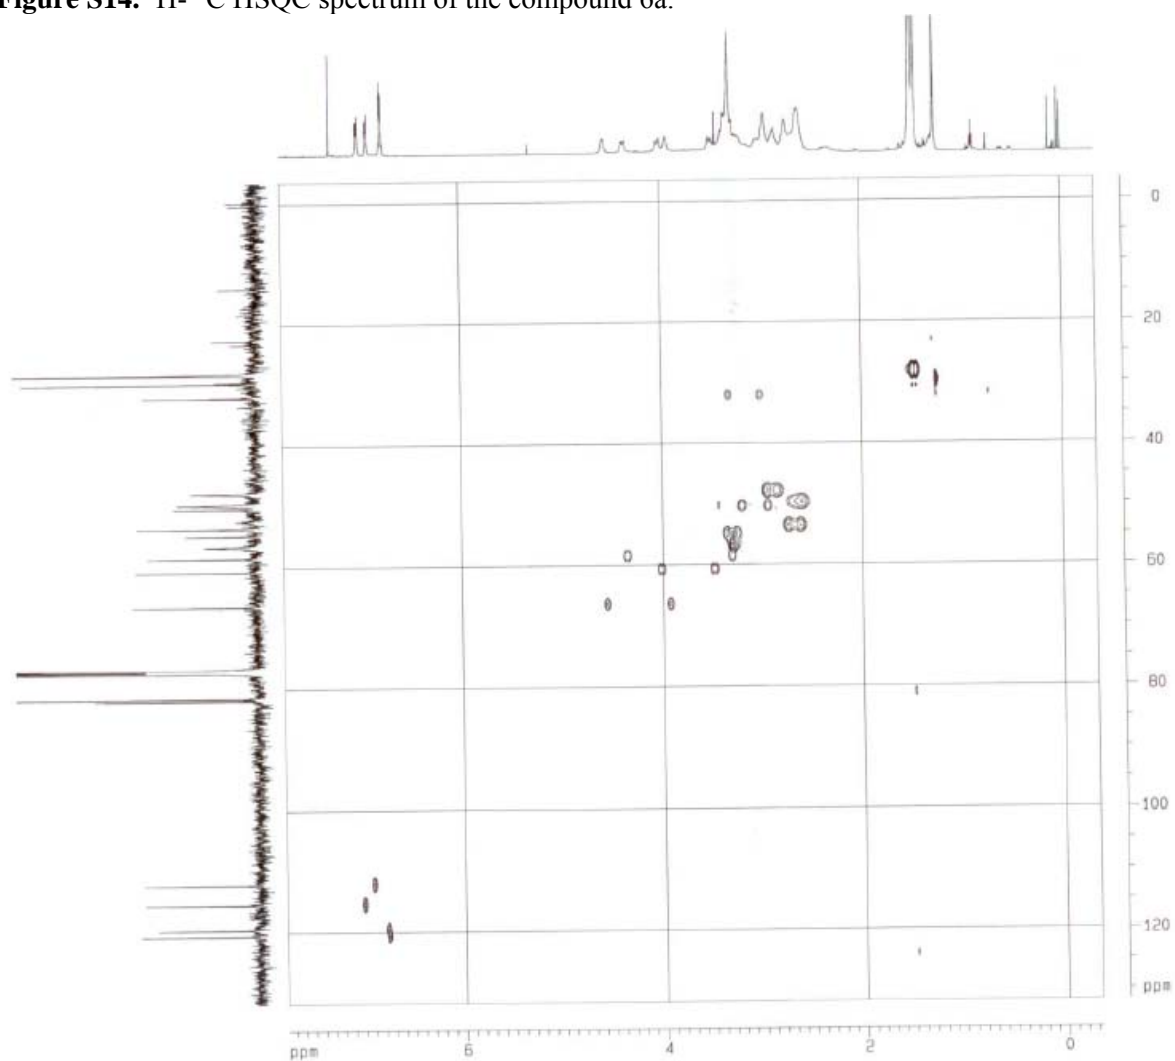

## References

- <sup>1</sup> T. J. Swift, R. E. Connick, *J. Chem. Phys.*, 1962, **37**, 307.
- <sup>2</sup> J. R. Zimmermann, W. E. Brittin, *J. Phys. Chem.*, 1957, **61**, 1328.
- <sup>3</sup> Z. Luz, S. Meiboom, *J. Chem. Phys.*, 1964, **40**, 2686.
- <sup>4</sup> J. H. Freed, *J. Chem. Phys.*, 1978, **68**, 4034.
- <sup>5</sup> S. H. Koenig, R. D. Brown III, *Prog. Nucl. Magn. Reson. Spectrosc.*, 1991, **22**, 487.
